# Supplementary material for: Primary 1,2-diamine catalysis III: an unexpected domino reaction for the synthesis of multisubstituted cyclohexa-1,3-dienamines
Source: Royal Society of Chemistry journal article supplement (doi:10.1039/c0ob00089b), 2010-01-01

## Supporting Information

### Primary 1,2-diamine catalysis III: An unexpected domino reaction for the synthesis of multisubstituted cyclohexa-1,3-dienamine

Junfeng Wang, Qin Li, Chao Qi, Yi Liu, Zemei Ge,\* and Run-Tao Li\*

*State Key Laboratory of Natural and Biomimetic Drugs, School of Pharmaceutical Sciences,  
Peking University, Beijing 100191, P. R. China*

[lirt@mail.bjmu.edu.cn](mailto:lirt@mail.bjmu.edu.cn); [zmge@bjmu.edu.cn](mailto:zmge@bjmu.edu.cn)

**General Methods.** Unless otherwise stated, all reagents were purchased from commercial suppliers and were used without further purification. Reactions were monitored by thin layer chromatography (TLC) on GF<sub>254</sub> silica gel plates, using UV light as a visualizing agent. Flash column chromatography was performed using 200-300 mesh silica gel. <sup>1</sup>H NMR spectra and <sup>13</sup>C NMR spectra were recorded on a Varian INOVA-500 (500 MHz) spectrometer in needful D-reagents with tetramethylsilane (TMS) as an internal reference. Data for <sup>1</sup>H NMR are reported as follows: chemical shift (ppm), and multiplicity (s = singlet, d = doublet, t = triplet, dd = double of doublet, br = broad, m = multiplet), coupling constants (Hz) and integration; Data for <sup>13</sup>C NMR are reported as ppm. Melting points were measured on an X<sub>4</sub>-type micro-melting point apparatus and were uncorrected. Electrospray ionization (ESI) mass spectrometry (MS) experiments were performed on an ABI PE-QSTAR mass spectrometer. High-resolution mass spectra (HRMS) were obtained on a Bruker APEX IV FT\_MS (7.0) spectrometer for electrospray ionization (ESI).

### Catalyst and Solvent Screening:

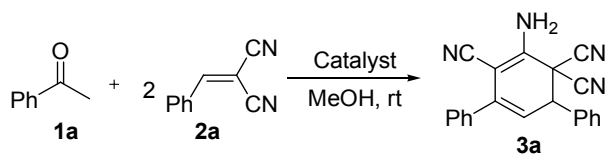

| Entry | Catalyst | Additive          | Media             | Time (h) | <b>3a</b> Yield (%) <sup>a</sup> |
|-------|----------|-------------------|-------------------|----------|----------------------------------|
| 1     |          | HOAc <sup>b</sup> | MeOH              | 12       | 66                               |
| 2     |          | HOAc <sup>b</sup> | MeOH              | 48       | 63                               |
| 3     |          | -                 | MeOH              | 12       | 64                               |
| 4     |          | -                 | MeOH              | 48       | 42                               |
| 5     |          | HOAc <sup>c</sup> | MeOH              | 48       | trace                            |
| 6     |          | -                 | MeOH              | 48       | trace                            |
| 7     |          | HOAc <sup>c</sup> | MeOH              | 48       | trace                            |
| 8     |          | -                 | MeOH              | 48       | trace                            |
| 9     |          | HOAc <sup>c</sup> | MeOH              | 48       | -                                |
| 10    |          | -                 | MeOH              | 48       | -                                |
| 11    |          | HOAc <sup>b</sup> | CHCl <sub>3</sub> | 48       | -                                |
| 12    |          | HOAc <sup>b</sup> | THF               | 48       | -                                |
| 13    |          | HOAc <sup>b</sup> | DMSO              | 48       | Trace                            |

<sup>a</sup> Isolated yield of the corresponding product; <sup>b</sup> The additive loading is 40 mol%; <sup>c</sup> The additive loading is 20 mol%.

## General procedure for multicomponent domino reactions:

To a mixture of ary ketone **1**, aromatic aldehyde **2** (1.0 mmol), malononitrile (2.2 mmol) and catalyst ethanediamine (0.2 mmol) in 1.0-1.5 ml of MeOH was added the acid additive HOAc (0.4 mmol). The resulting mixture was stirred under room temperature for the required time monitored by TLC (silica gel, pet ether: ethyl acetate, 4:1). The resulting mixture was then directly purified by filtration and/or recrystallization to afford the pure products **3**.

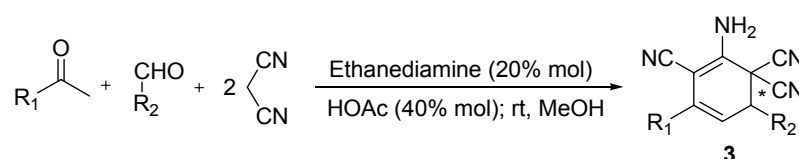

| Entry <sup>a</sup> | R <sub>1</sub> | R <sub>2</sub>                    | Time(h) | Yield (%) <sup>b</sup> |
|--------------------|----------------|-----------------------------------|---------|------------------------|
| 1                  | Ph             | Ph                                | 15      | <b>3a</b> -90          |
| 2                  | Ph             | 2-CIPh                            | 12      | <b>3b</b> -92          |
| 3                  | Ph             | 3-CIPh                            | 12      | <b>3c</b> -95          |
| 4                  | Ph             | 4-MePh                            | 10      | <b>3d</b> -89          |
| 5                  | Ph             | Me(CH <sub>2</sub> ) <sub>9</sub> | 10      | <b>3e</b> -91          |
| 6                  | 4-MePh         | Ph                                | 15      | <b>3f</b> -88          |
| 7                  | 4-MePh         | 2-CIPh                            | 18      | <b>3g</b> -86          |
| 8                  | 4-MePh         | 3-CIPh                            | 18      | <b>3h</b> -90          |
| 9                  | 4-MePh         | 3-BrPh                            | 14      | <b>3i</b> -96          |
| 10                 | 3-CIPh         | 4-CIPh                            | 13      | <b>3j</b> -93          |
| 11                 | 3-CIPh         | 4-MePh                            | 12      | <b>3k</b> -93          |
| 12                 | 4-FPh          | Ph                                | 18      | <b>3l</b> -91          |
| 13                 | 4-FPh          | 3-FPh                             | 12      | <b>3m</b> -89          |
| 14                 | 3,4-diCIPh     | Ph                                | 12      | <b>3n</b> -95          |
| 15                 | 3,4-diCIPh     | 3-CIPh                            | 12      | <b>3o</b> -95          |
| 16                 | 3,4-diMeOPh    | Ph                                | 32      | <b>3p</b> -86          |

<sup>a</sup> All the reactions were conducted at room temperature; <sup>b</sup> Isolated yields of the corresponding products.

## Scope of the Domino Reactions:

**2-amino-4,6-diphenylcyclohexa-2,4-diene-1,1,3-tricarbonitrile 3a:**<sup>1</sup> obtained in

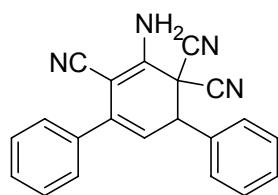

90% yield; white powder; m.p. 158-160°C; <sup>1</sup>H NMR (500 MHz, CDCl<sub>3</sub>): δ 7.50 (s, 1H), 7.46-7.43 (m, 1H), 7.42-7.39 (m, 2H), 7.32-7.31(m, 2H), 7.23 (d, *J* = 7.5 Hz, 2H), 5.72 (d, *J* = 4.0 Hz, 1H), 5.60 (s, 2H), 4.24 (d, *J* = 4.0 Hz, 1H), 2.39 (s, 3H); ESI (*m/z*): [(M+H)<sup>+</sup>] calcd. for C<sub>21</sub>H<sub>15</sub>N<sub>4</sub> 323.1297, found 323.1305.

**2-amino-6-(2-chlorophenyl)-4-phenylcyclohexa-2,4-diene-1,1,3-tricarbonitrile 3b:**

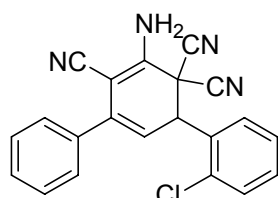

obtained in 92% yield;<sup>2</sup> light yellow powder; m.p. 152-154°C; <sup>1</sup>H NMR (500 MHz, CDCl<sub>3</sub>): δ 7.66 (dd, *J* = 2.5 Hz, 7.5 Hz, 1H), 7.54 (dd, *J* = 2.0 Hz, 7.5 Hz, 1H), 7.40-7.25 (m, 7H), 5.69 (d, *J* = 4.0 Hz, 1H), 5.67 (s, 2H), 5.11 (d, *J* = 4.0 Hz, 1H);

<sup>13</sup>C NMR (125 MHz, CDCl<sub>3</sub>): δ 145.8, 137.9, 136.6, 135.2, 132.2, 131.3, 130.7, 130.3, 129.5, 129.0, 128.3, 127.7, 116.3, 115.9, 111.5, 110.9, 82.2, 44.2, 43.0.

**2-amino-6-(3-chlorophenyl)-4-phenylcyclohexa-2,4-diene-1,1,3-tricarbonitrile 3c:**

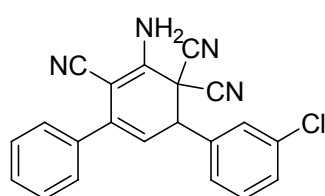

obtained in 95% yield; colorless crystals; m.p. 226-228°C; <sup>1</sup>H NMR (500 MHz, CDCl<sub>3</sub>): δ 7.51 (m, 1H), 7.48-7.45 (m, 1H), 7.42-7.39 (m, 8H), 5.77 (d, *J* = 3.5 Hz, 1H), 5.24 (s, 2H), 4.25 (d, *J* = 4.0 Hz, 1H); <sup>13</sup>C NMR (125 MHz,

CDCl<sub>3</sub>): δ 145.1, 137.8, 136.1, 135.7, 135.3, 130.6, 130.3, 129.5, 129.4, 129.1, 128.8, 127.6, 127.5, 115.3, 111.6, 110.2, 82.6, 48.6, 43.9; ESI (*m/z*): [(M+Na)<sup>+</sup>] calcd. for C<sub>21</sub>H<sub>13</sub>ClN<sub>4</sub>Na 379.0726, found 379.1204.

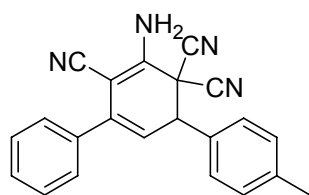

**2-amino-4-phenyl-6-p-tolylcyclohexa-2,4-diene-1,1,3-tricarbonitrile 3d:** obtained in 89% yield; yellow powder; m.p.

210-212°C; <sup>1</sup>H NMR (400 MHz, CDCl<sub>3</sub>): δ 7.43 (m, 5H), 7.40 (d, *J* = 10.5 Hz, 2H), 7.27 (d, *J* = 9.5 Hz, 2H), 5.82 (d, *J* = 5.0 Hz, 1H), 5.59 (s, 2H), 4.26 (d, *J* = 4.5 Hz, 1H); <sup>13</sup>C NMR (100 MHz, CDCl<sub>3</sub>):

$\delta$  145.6, 139.8, 137.0, 136.3, 129.8, 128.9, 127.3, 116.1, 115.6, 115.6, 111.8, 110.4, 81.3, 48.6, 44.1, 21.0; ESI ( $m/z$ ):  $[(M+Na)^+]$  calcd. for  $C_{22}H_{16}N_4Na$  359.1273, found 359.1270.

**2-amino-6-decyl-4-phenylcyclohexa-2,4-diene-1,1,3-tricarbonitrile 3e:** obtained in

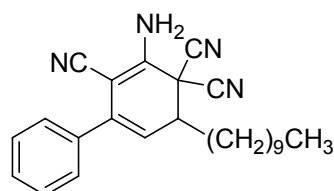

91% yield; colorless oil;  $^1H$  NMR (500 MHz,  $CDCl_3$ ):  $\delta$  7.41-7.36 (m, 5H), 5.61 (d,  $J = 3.5$  Hz, 1H), 5.45 (s, 2H), 3.01 (dt,  $J = 3.5$  Hz, 1H), 1.93-1.87 (m, 1H), 1.87-1.78 (m, 1H), 1.66-1.60 (m, 1H), 1.56-1.26 (m, 19H), 0.89 (t,  $J = 6.5$  Hz, 4H);  $^{13}C$  NMR (125 MHz,  $CDCl_3$ ):  $\delta$  145.3, 136.5, 136.3, 129.0, 128.6, 127.4, 115.8, 115.5, 112.4, 110.6, 82.3, 42.4, 42.3, 31.9, 29.9, 29.5, 29.5, 29.3, 29.3, 29.2, 26.4, 22.7, 14.1; HRMS-ESI ( $m/z$ ):  $[(M+H)^+]$  calcd. for  $C_{25}H_{30}N_4Na$  409.2368, found 409.2365.

**2-amino-6-phenyl-4-p-tolylcyclohexa-2,4-diene-1,1,3-tricarbonitrile 3f:**<sup>3</sup> obtained

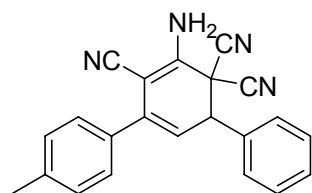

in 88% yield; light yellow powder; m.p. 162-164°C;  $^1H$  NMR (500 MHz,  $CDCl_3$ ):  $\delta$  7.52-7.49 (m, 2H), 7.47-7.44 (m, 3H), 7.44-7.35 (m, 3H), 7.33-7.31 (m, 2H), 7.22 (d,  $J = 7.5$  Hz, 2H), 5.79 (d,  $J = 3.5$  Hz, 1H), 5.53 (s, 2H), 4.26 (d,  $J = 3.5$  Hz, 1H), 2.38 (s, 3H);  $^{13}C$  NMR (125 MHz,  $CDCl_3$ ):  $\delta$  145.3, 139.3, 137.2, 133.8, 133.5, 129.9, 129.7, 129.4, 129.4, 129.3, 129.1, 128.4, 127.3, 115.7, 115.6, 111.9, 110.5, 82.5, 49.1, 44.2, 21.3.

**2-amino-6-(2-chlorophenyl)-4-p-tolylcyclohexa-2,4-diene-1,1,3-tricarbonitrile 3g:**

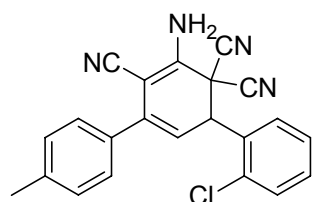

obtained in 86% yield;<sup>4</sup> yellow powder; m.p. 208-210°C;  $^1H$  NMR (500 MHz,  $CDCl_3$ ):  $\delta$  7.66 (dd,  $J = 2.0$  Hz, 7.5 Hz, 1H), 7.53 (dd,  $J = 1.5$  Hz, 7.5 Hz, 1H), 7.41-7.35 (m, 2H), 7.31 (d,  $J = 8.0$  Hz, 1H), 7.22 (d,  $J = 8.0$  Hz, 1H), 5.66 (d,  $J = 4.0$  Hz, 1H), 5.96 (s, 2H), 5.10 (d,  $J = 3.5$  Hz, 1H), 2.38 (s, 3H);  $^{13}C$  NMR (125 MHz,  $CDCl_3$ ):  $\delta$  145.2, 139.3, 137.5, 134.9, 133.4, 131.9, 130.9, 130.5, 130.0, 129.4,

127.9, 127.3, 115.6, 115.4, 111.3, 110.6, 82.3, 43.9, 42.7, 21.3.

**2-amino-6-(3-bromophenyl)-4-p-tolylcyclohexa-2,4-diene-1,1,3-tricarbonitrile 3h:**

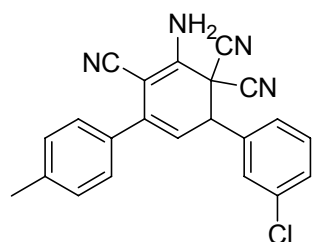

obtained in 90% yield;<sup>4</sup> white powder; m.p. 98-99 °C; <sup>1</sup>H NMR (500 MHz, CDCl<sub>3</sub>): δ 7.49 (s, 1H), 7.47-7.43 (m, 1H), 7.40-7.38 (m, 2H), 7.32 (d, *J* = 8.0 Hz, 2H), 7.23 (d, *J* = 8.0 Hz, 2H), 5.72 (d, *J* = 4.0 Hz, 1H), 5.63 (s, 2H), 4.23 (d, *J* = 4.0 Hz, 1H), 2.39 (s, 3H); <sup>13</sup>C NMR (125 MHz, CDCl<sub>3</sub>): δ 145.4, 139.4, 137.7, 135.8, 135.2, 133.3, 130.6, 130.2, 129.5, 129.4, 127.6, 127.3, 115.6, 114.5, 111.6, 110.3, 82.2, 48.6, 43.9, 21.3.

**2-amino-6-(3-bromophenyl)-4-p-tolylcyclohexa-2,4-diene-1,1,3-tricarbonitrile 3i:**

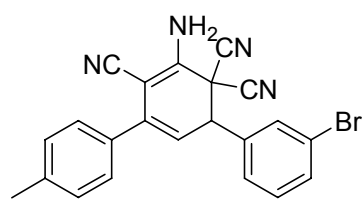

obtained in 96% yield; white powder; mp: 205-209 °C; <sup>1</sup>H NMR (500 MHz, CDCl<sub>3</sub>): δ 7.65 (m, 1H), 7.61-7.59 (m, 1H), 7.45 (d, *J* = 8.0 Hz, 1H), 7.35-7.30 (m, 3H), 7.25-7.22 (m, 2H), 5.71 (d, *J* = 3.5 Hz, 1H), 5.63 (s, 2H), 4.22 (d, *J* = 3.5 Hz, 1H), 2.39 (s, 3H); <sup>13</sup>C NMR (125 MHz, CDCl<sub>3</sub>): δ 145.4, 139.4, 137.8, 136.1, 133.3, 133.1, 132.4, 130.8, 129.4, 128.1, 127.3, 123.2, 115.6, 114.5, 111.7, 110.3, 82.2, 48.5, 43.9, 21.3; HRMS-ESI (*m/z*): [(M+H)<sup>+</sup>] calcd. for C<sub>22</sub>H<sub>15</sub>BrN<sub>4</sub>Na 437.0378, found 437.0377.

**2-amino-4-(3-chlorophenyl)-6-(4-chlorophenyl)cyclohexa-2,4-diene-1,1,3-tricarbonitrile 3j:**

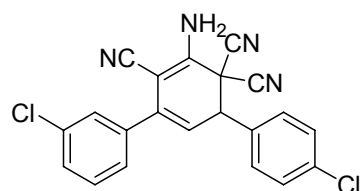

obtained in 93% yield; white powder; mp: 172-174 °C; <sup>1</sup>H NMR (500 MHz, CDCl<sub>3</sub>): δ 7.51-7.43 (m, 4H), 7.41-7.35 (m, 3H), 7.32-7.30 (m, 1H), 5.78 (d, *J* = 4.0 Hz, 1H), 5.68 (s, 2H), 4.27 (d, *J* = 3.5 Hz, 1H); <sup>13</sup>C NMR (125 MHz, CDCl<sub>3</sub>): δ 145.7, 137.9, 136.7, 136.3, 134.7, 131.8, 130.7, 130.0, 129.7, 129.4, 127.6, 125.7, 116.3, 115.2, 111.5, 110.2, 81.4, 48.4, 43.9; HRMS-ESI (*m/z*): [(M+H)<sup>+</sup>] calcd. for C<sub>21</sub>H<sub>12</sub>Cl<sub>2</sub>N<sub>4</sub>Na 413.0337, found 413.0334.

**2-amino-4-(3-chlorophenyl)-6-p-tolylcyclohexa-2,4-diene-1,1,3-tricarbonitrile 3k:**

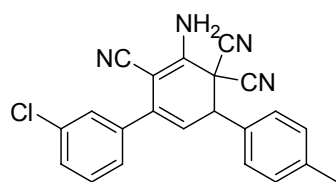

obtained in 93% yield; light yellow powder; mp: 159-162 °C; <sup>1</sup>H NMR (500 MHz, CDCl<sub>3</sub>): δ 7.41-7.34 (m, 5H), 7.32-7.30 (m, 1H), 7.27-7.26 (m, 2H), 5.82 (d, *J* = 4.5 Hz, 1H), 5.60 (s, 2H), 4.24 (d, *J* = 4.0 Hz, 1H), 2.39 (s, 3H);

<sup>13</sup>C NMR (125 MHz, CDCl<sub>3</sub>): δ 145.7, 140.2, 138.1, 136.1, 134.7, 130.3, 130.1, 130.0, 129.3, 129.2, 127.6, 125.7, 117.3, 115.4, 111.8, 110.4, 81.5, 48.7, 44.1, 21.2; HRMS-ESI (*m/z*): [(M+H)<sup>+</sup>] calcd. for C<sub>21</sub>H<sub>15</sub>ClN<sub>4</sub>Na 393.0883, found 393.0878.

**2-amino-4-(4-fluorophenyl)-6-phenylcyclohexa-2,4-diene-1,1,3-tricarbonitrile 3l:**

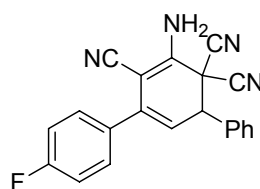

obtained in 91% yield; white powder; mp: 160-161 °C; <sup>1</sup>H NMR (500 MHz, CDCl<sub>3</sub>): δ 7.51-7.45 (m, 5H), 7.42-7.38 (m, 2H), 7.14-7.09 (m, 2H), 5.79 (d, *J* = 3.5 Hz, 1H), 5.60 (s, 2H), 4.27 (d, *J* = 3.5 Hz, 1H), 2.39 (s, 3H); <sup>13</sup>C NMR (125 MHz,

CDCl<sub>3</sub>): δ 163.3 (d, <sup>1</sup>*J*<sub>C-F</sub> = 247.9 Hz), 145.6, 136.4, 133.6, 132.5, 130.0, 129.4, 129.3, 116.2, 115.9, 115.7, 115.5, 111.8, 110.4, 81.9, 49.0, 44.1; HRMS-ESI (*m/z*): [(M+Na)<sup>+</sup>] calcd. for C<sub>21</sub>H<sub>13</sub>FN<sub>4</sub>Na 359.1108, found 363.1019.

**2-amino-6-(3-fluorophenyl)-4-(4-fluorophenyl)cyclohexa-2,4-diene-1,1,3-tricarbo**

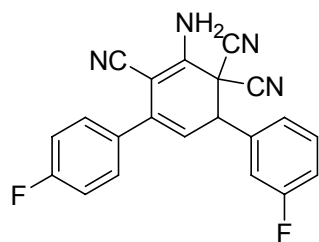

**nitrile 3m:** obtained in 89% yield; white powder; mp: 162-164 °C; <sup>1</sup>H NMR (500 MHz, CDCl<sub>3</sub>): δ 7.51-7.45 (m, 5H), 7.42-7.38 (m, 2H), 7.14-7.09 (m, 2H), 5.79 (d, *J* = 3.5 Hz, 1H), 5.60 (s, 2H), 4.27 (d, *J* = 3.5 Hz, 1H), 2.39 (s, 3H); <sup>13</sup>C NMR (125 MHz, CDCl<sub>3</sub>): δ 163.3 (d, <sup>1</sup>*J*<sub>C-F</sub> = 248.0

Hz), 162.9 (d, <sup>1</sup>*J*<sub>C-F</sub> = 247.0 Hz), 145.6, 136.9, 136.0, 135.9, 132.3, 131.1, 131.0, 129.4, 129.3, 125.2, 117.2, 117.1, 116.5, 116.4, 115.9, 115.7, 115.4, 115.3, 111.6, 110.2, 81.8, 48.6, 43.8; HRMS-ESI (*m/z*): [(M+H)<sup>+</sup>] calcd. for C<sub>21</sub>H<sub>13</sub>F<sub>2</sub>N<sub>4</sub> 359.1108, found 359.1106.

### 2-amino-4-(3,4-dichlorophenyl)-6-phenylcyclohexa-2,4-diene-1,1,3-tricarbonitrile

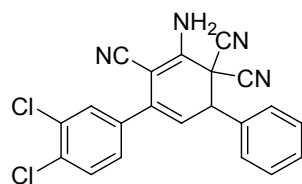

**3n:** obtained in 95% yield; light yellow powder; m.p.: 124-126 °C; <sup>1</sup>H NMR (500 MHz, CDCl<sub>3</sub>): δ 7.52-7.48 (m, 7H), 7.27 (dd, *J* = 1.6 Hz, 8.0 Hz, 1H), 5.84 (d, *J* = 3.5 Hz, 1H), 5.63 (s, 2H), 4.27 (d, *J* = 3.5 Hz, 1H); <sup>13</sup>C NMR (125 MHz, CDCl<sub>3</sub>): δ 145.9, 136.2, 135.4, 133.6, 133.2, 133.1, 130.7, 130.1, 129.5, 129.4, 129.3, 126.8, 117.4, 115.2, 111.6, 110.2, 81.2, 49.0, 43.9; HRMS-ESI (*m/z*): [(M+H)<sup>+</sup>] calcd. for C<sub>21</sub>H<sub>13</sub>Cl<sub>2</sub>N<sub>4</sub> 391.0517, found 391.0519.

### 2-amino-6-(3-chlorophenyl)-4-(3,4-dichlorophenyl)cyclohexa-2,4-diene-1,1,3-tricarbonitrile **3o**

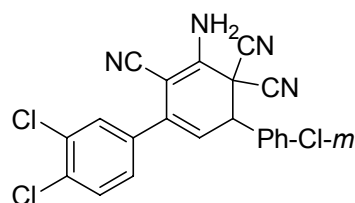

**arbitrarily 3o:** obtained in 95% yield; white powder; m.p. 129-130 °C; <sup>1</sup>H NMR (500 MHz, CDCl<sub>3</sub>): δ 7.53-7.51 (m, 2H), 7.49-7.47 (m, 2H), 7.44-7.35 (m, 3H), 7.28-7.26 (m, 3H), 5.79 (d, *J* = 4.0 Hz, 1H), 5.59 (s, 2H), 4.25 (d, *J* = 3.5 Hz, 1H); <sup>13</sup>C NMR (125 MHz, CDCl<sub>3</sub>): δ 145.7, 135.9, 135.9, 135.4, 135.2, 133.7, 133.2, 130.8, 130.7, 130.5, 129.4, 129.4, 127.5, 126.8, 116.4, 114.9, 111.3, 109.9, 81.4, 48.6, 43.7, 14.2; HRMS-ESI (*m/z*): [(M+Na)<sup>+</sup>] calcd. for C<sub>21</sub>H<sub>12</sub>Cl<sub>3</sub>N<sub>4</sub>Na 446.9947, found 446.9942.

### 4-(3,4-dimethoxyphenyl)-6-phenylcyclohexa-2,4-diene-1,1,2,3-tetracarbonitrile

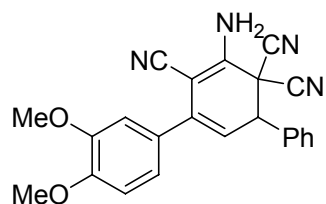

**3p:** obtained in 86% yield; light yellow powder; m.p. 122-124 °C; <sup>1</sup>H NMR (500 MHz, CDCl<sub>3</sub>): δ 7.53-7.48 (m, 5H), 7.01 (dd, *J* = 1.5 Hz, 8.5 Hz, 1H), 6.92-6.89 (m, 2H), 5.79 (d, *J* = 3.5 Hz, 1H), 5.53 (s, 2H), 4.27 (d, *J* = 3.0 Hz, 1H), 3.92 (s, 3H), 3.91 (s, 3H); <sup>13</sup>C NMR (125 MHz, CDCl<sub>3</sub>): δ 149.9, 148.9, 145.3, 136.9, 133.9, 129.9, 129.4, 129.3, 129.0, 120.2, 115.8, 115.1, 111.9, 111.1, 110.6, 110.5, 82.6, 56., 55.9, 49.1, 44.2; HRMS-ESI (*m/z*): [(M+Na)<sup>+</sup>] calcd. for C<sub>23</sub>H<sub>18</sub>N<sub>4</sub>O<sub>2</sub>Na 405.1327, found 405.1322.



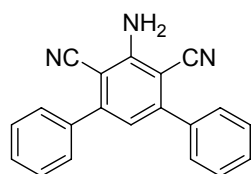

**2,6-dicyano-3,5-diphenylaniline 4a:** obtained in 21% yield; white powder;  $^1\text{H}$  NMR (500 MHz,  $\text{CDCl}_3$ ):  $\delta$  7.59-7.48 (m, 10H), 6.90 (s, 1H), 5.38 (s, 2H).

**2-amino-4-phenyl-4a,5,6,7-tetrahydronaphthalene-1,3,3(4H)-tricarbonitrile 7a:**

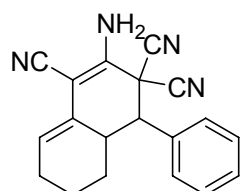

obtained in 86% yield; white powder; m.p. 254-255 °C;  $^1\text{H}$  NMR (500 MHz,  $\text{CDCl}_3$ ):  $\delta$  7.58 (m, 1H), 7.49-7.44 (m, 4H), 7.29 (m, 1H), 6.05 (d,  $J = 2.5$  Hz, 1H), 4.89 (s, 2H), 3.13-3.05 (m, 1H), 2.90-2.85 (m, 1H), 2.31-2.26 (m, 1H), 2.19-2.10 (m, 1H), 1.81-1.78 (m, 1H), 1.70-1.66 (m, 1H), 1.56-1.46 (m, 1H), 0.99-0.91 (m, 1H);  $^{13}\text{C}$  NMR (125 MHz,  $\text{CDCl}_3$ ):  $\delta$  140.3, 133.6, 131.8, 129.6, 129.2, 127.5, 126.6, 125.6, 115.1, 111.9, 111.8, 88.3, 52.2, 43.2, 34.7, 27.2, 25.4, 21.4.

**References:**

1. V. A. Tafeenko, Y. T. Abramenko, A. Ivashchenko, *Zhurnal Organicheskoi Khimii*, 1989, **25**, 482.
2. Y. A. Sharanin, Y. A. Baskakov, Y. T. Abramenko, Y. G. Putsykin, A. F. Vasil'ev, E. B. Nazarova, *Zhurnal Organicheskoi Khimii*, 1980, **16**, 2192.
3. Y. T. Abramenko, A. B. Ivashchenko, K. A. Nogaeva, Y. A. Sharanin, *Khimiya Geterotsiklicheskih Soedinenii*, 1986, **5**, 621.
4. X. S. Wang, M. M. Wang, Q. Li, C. S. Yao, S. J. Tu, *Tetrahedron*, 2007, **63**, 5265.

### NMR spectra for product 3

#### 3a

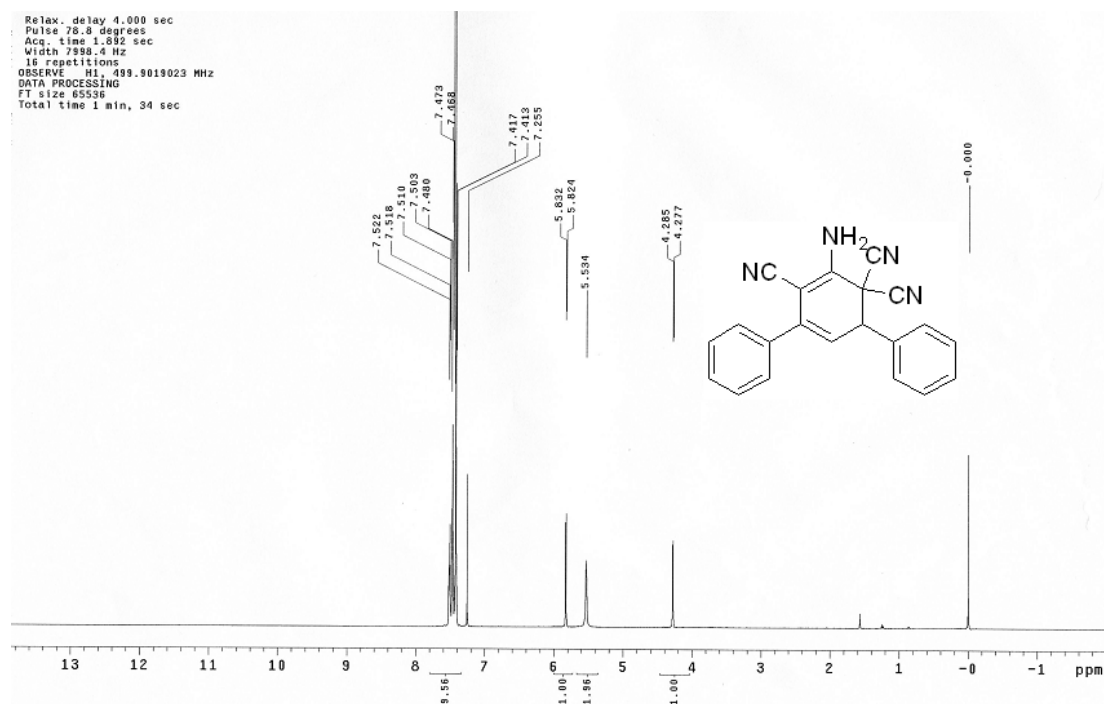

#### 3b

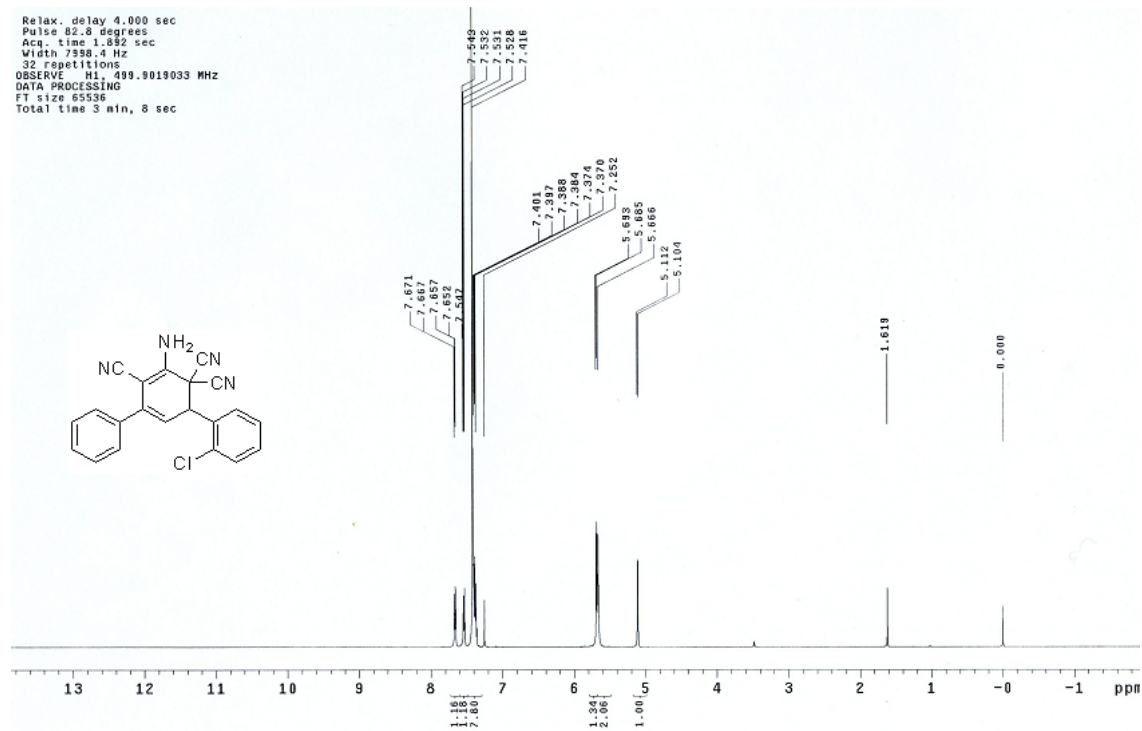

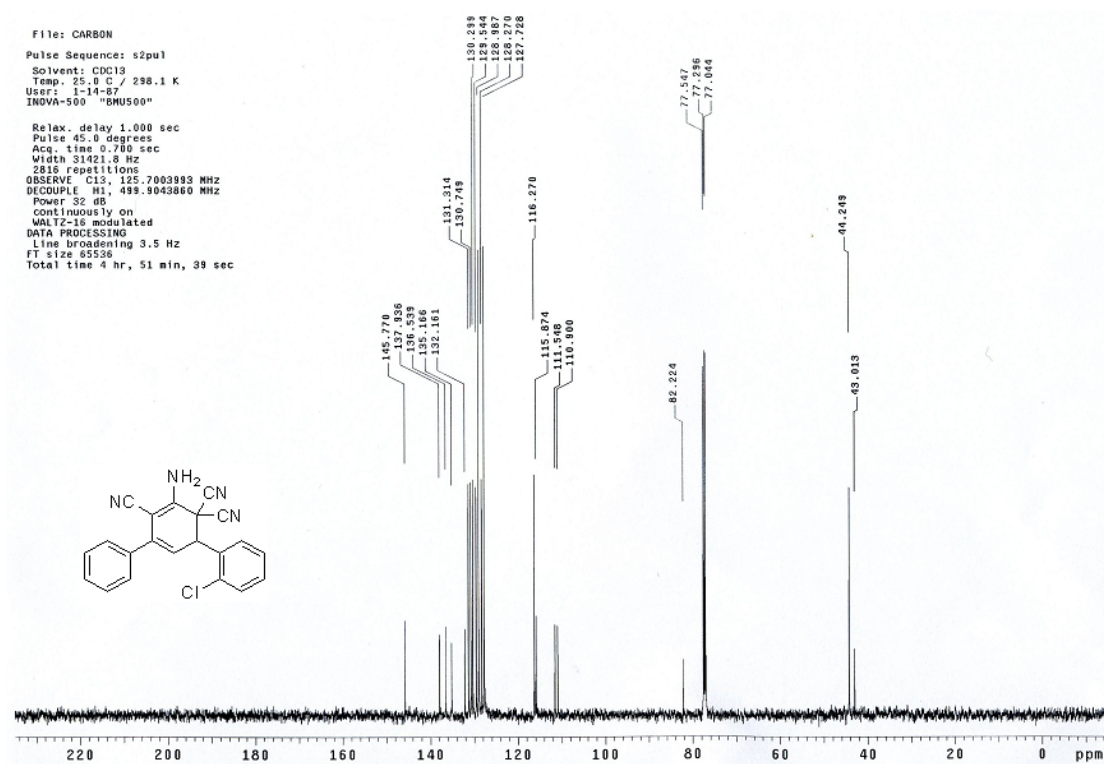

**3c**

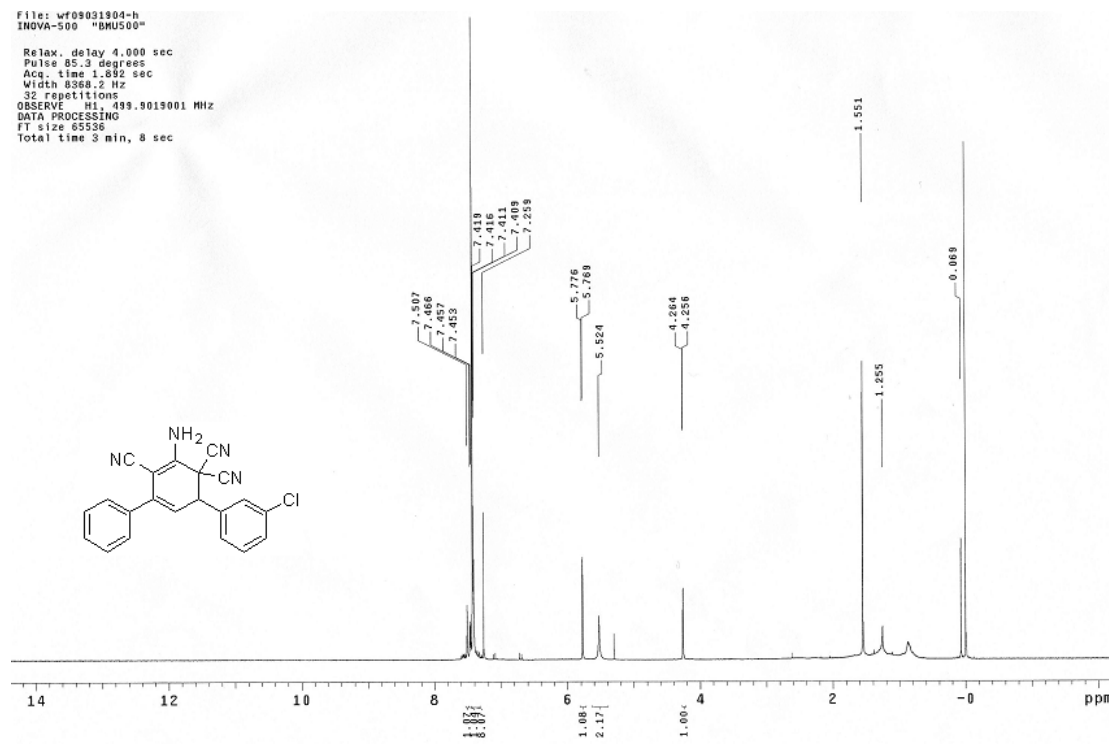

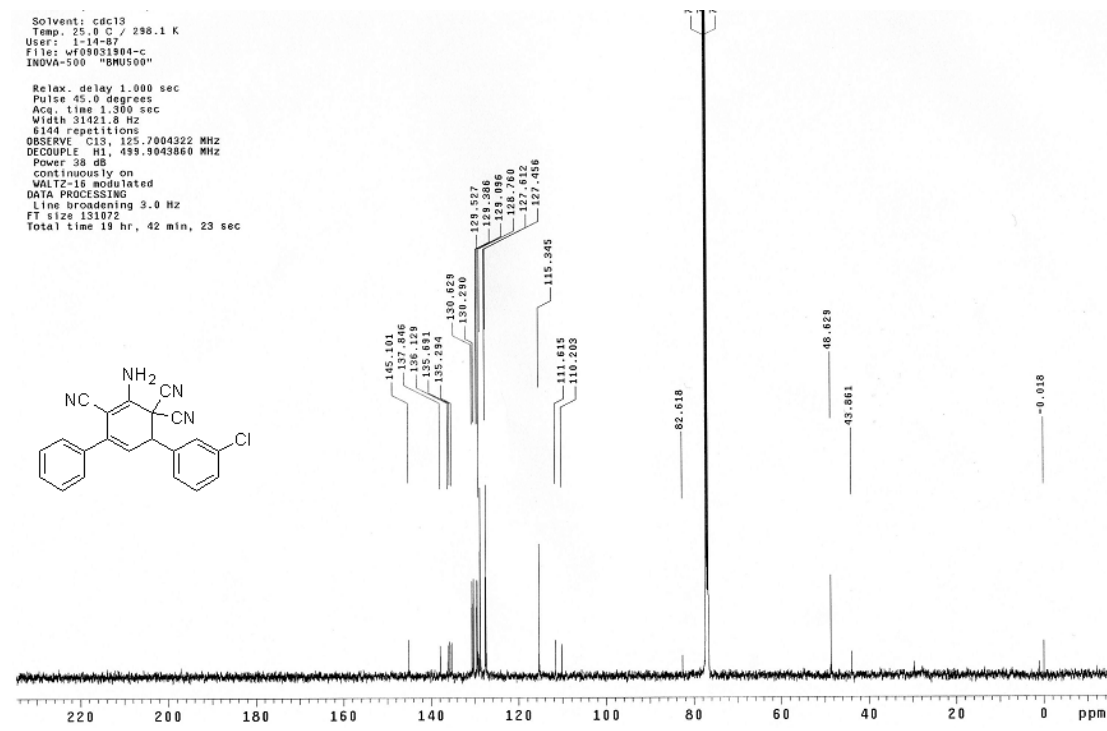

**3d**

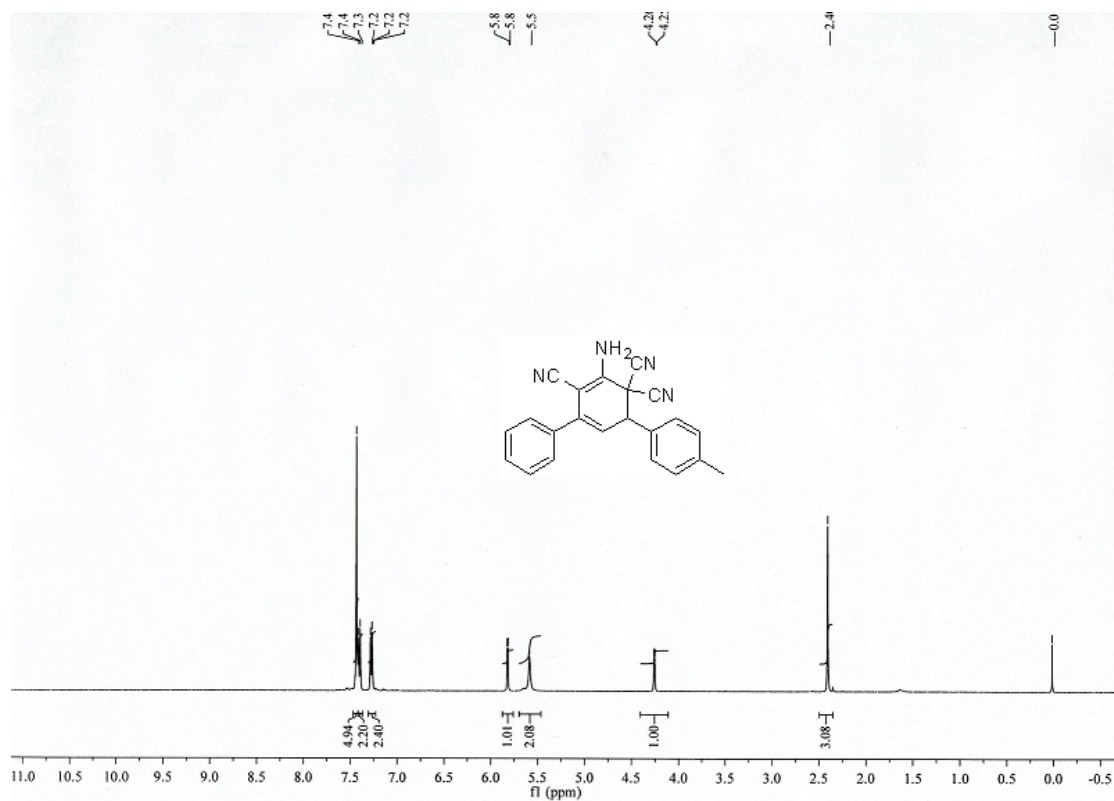

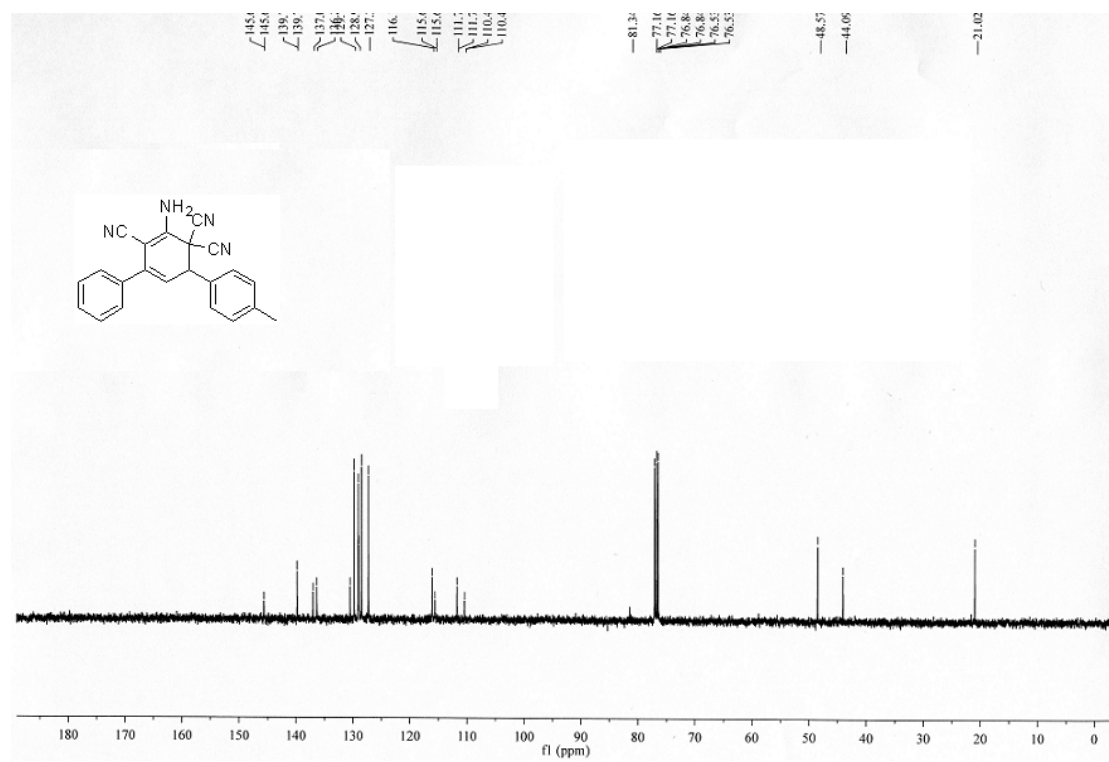

### 3e

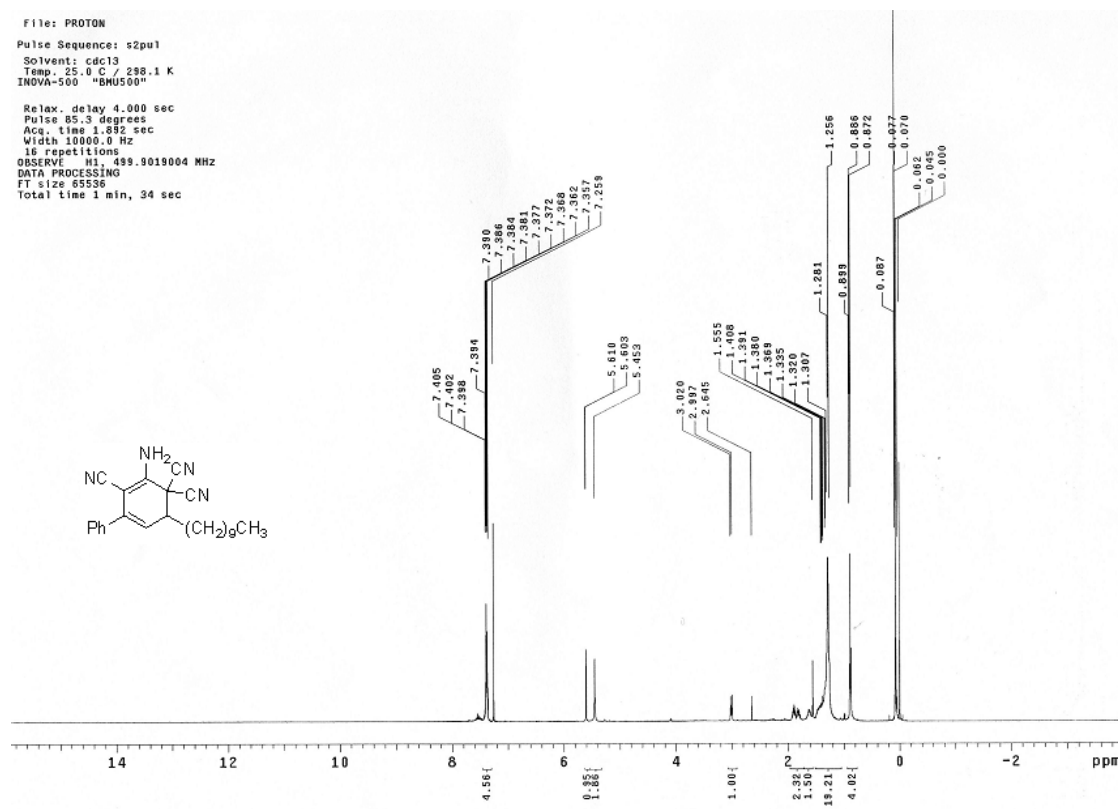

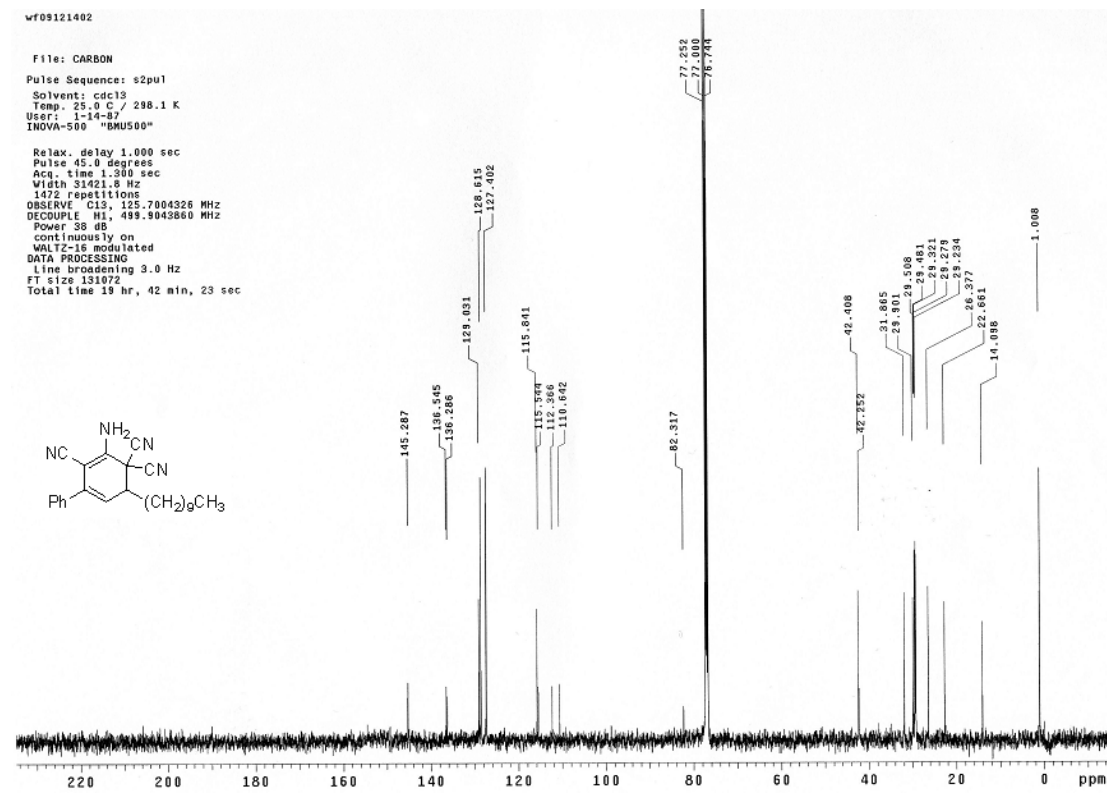

### 3f

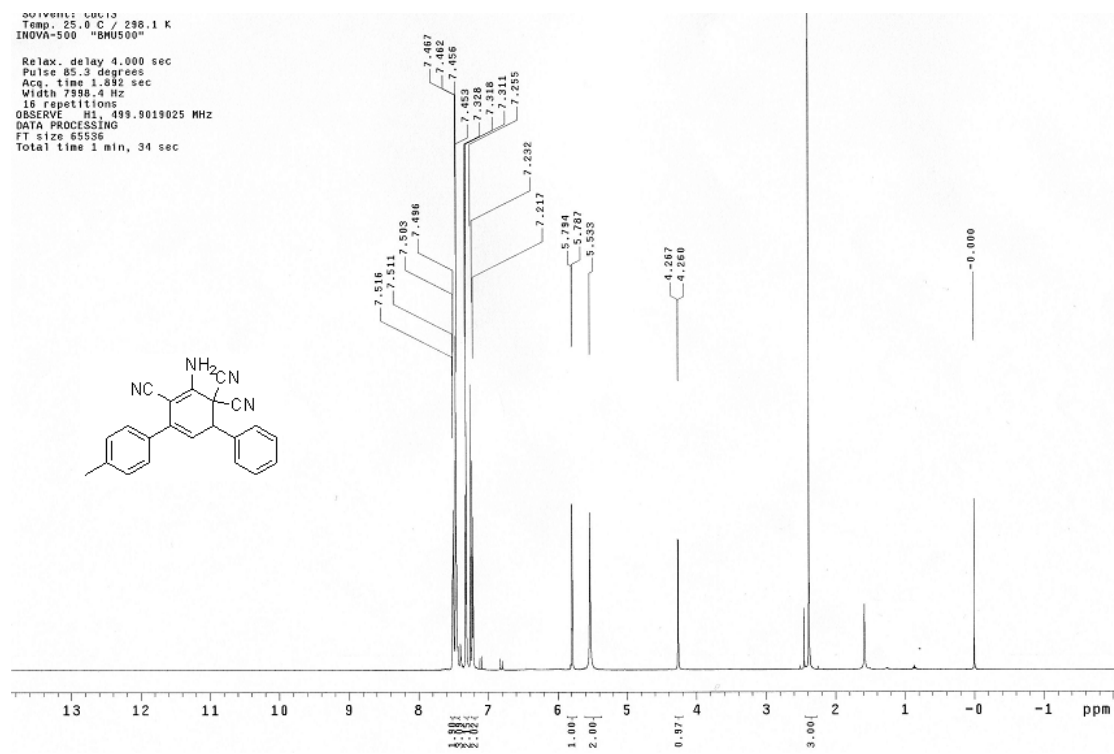

Supplementary Material (ESI) for Organic & Biomolecular Chemistry  
This journal is (c) The Royal Society of Chemistry 2010

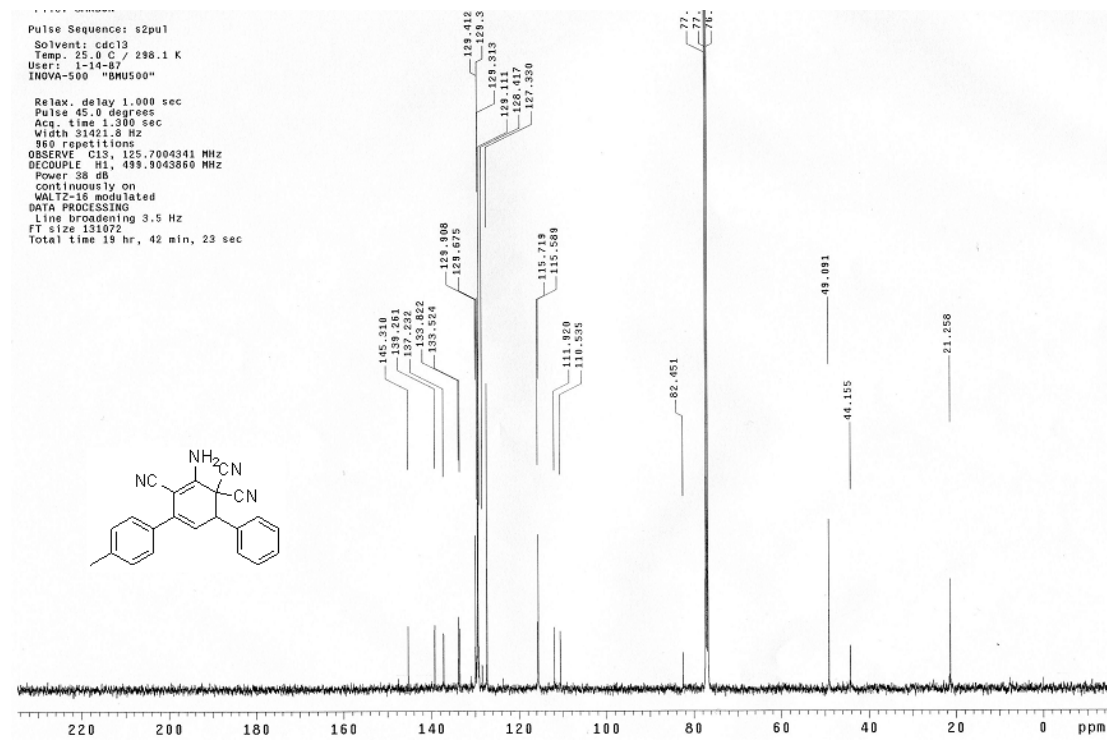

**3g**

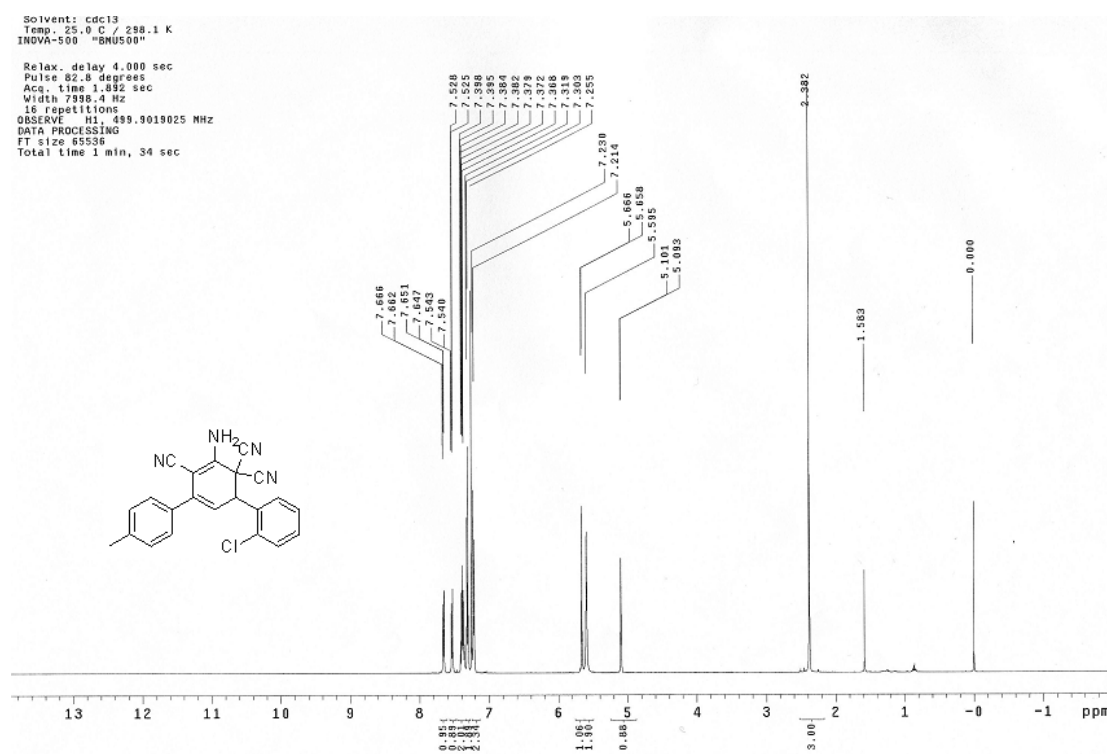

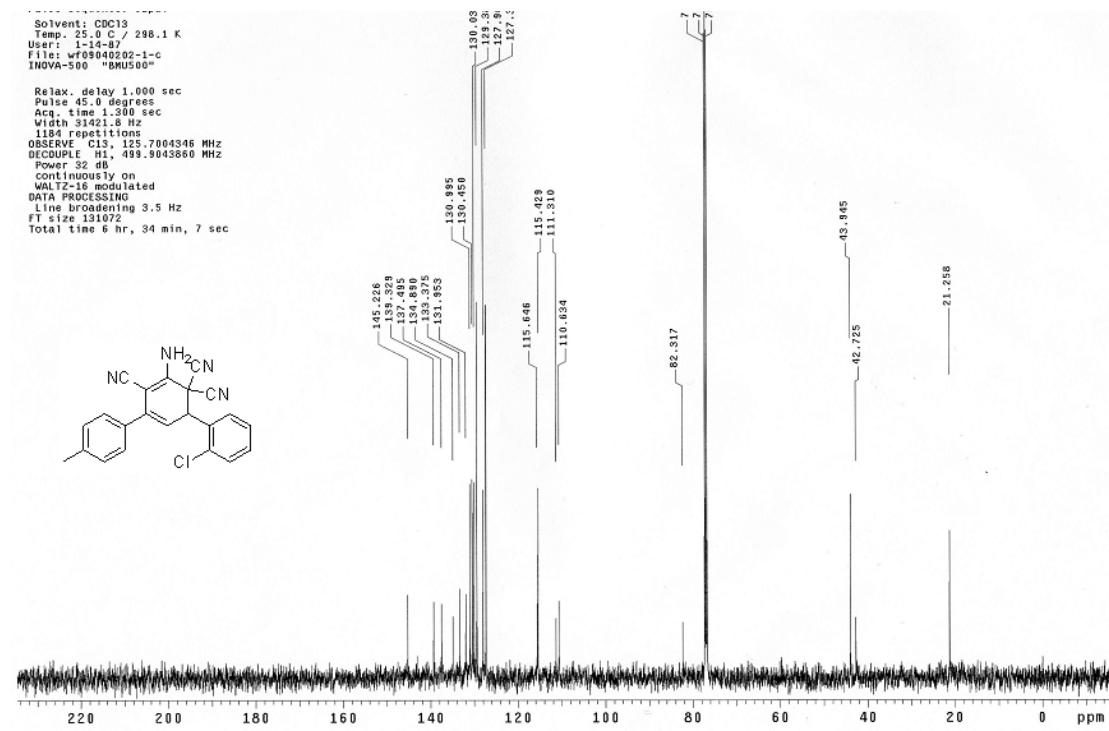

### 3h

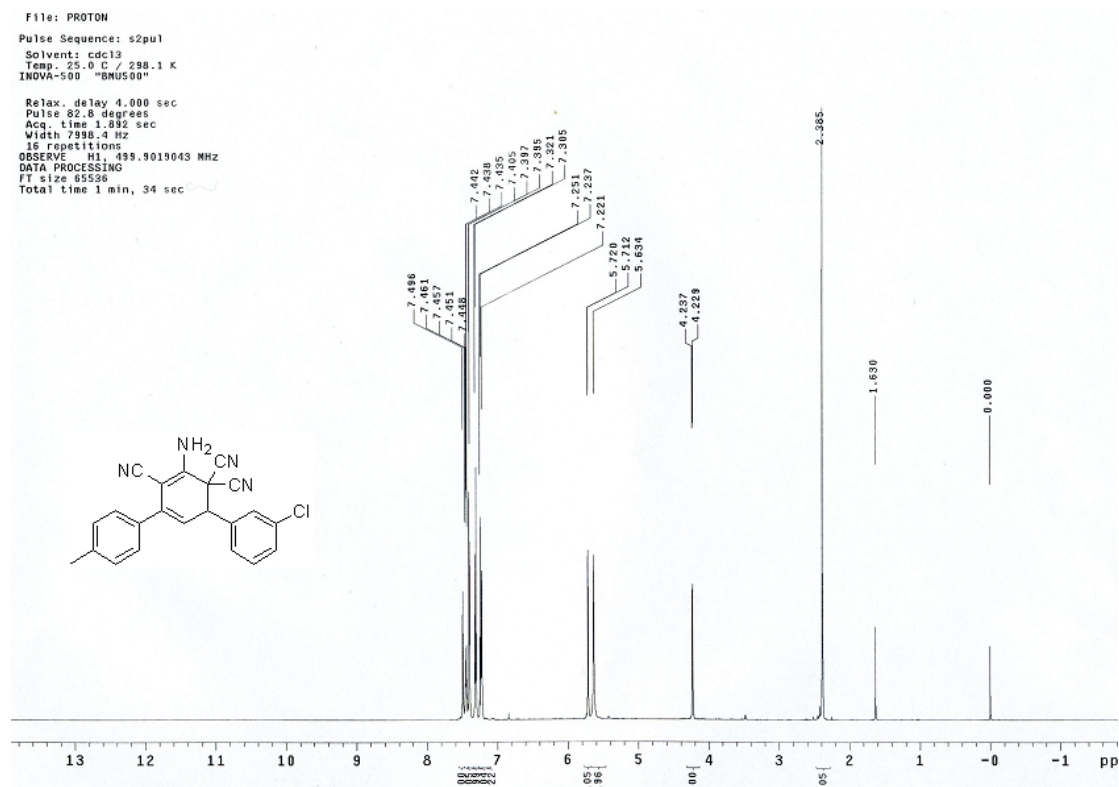



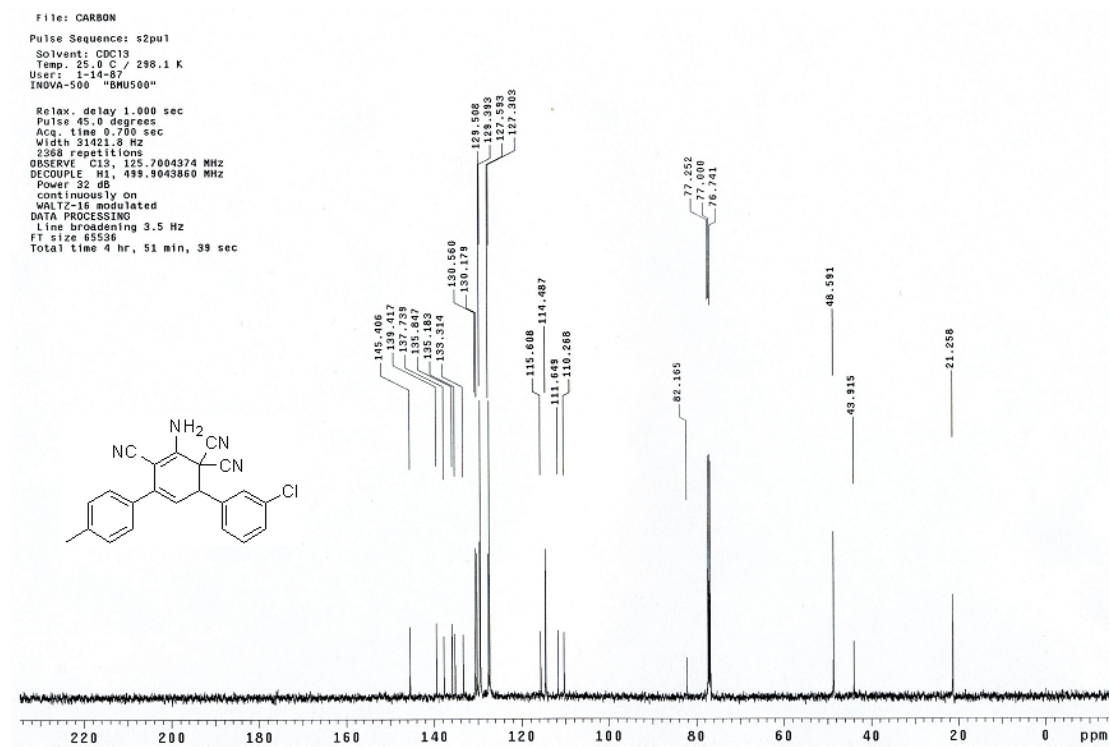

**3i**

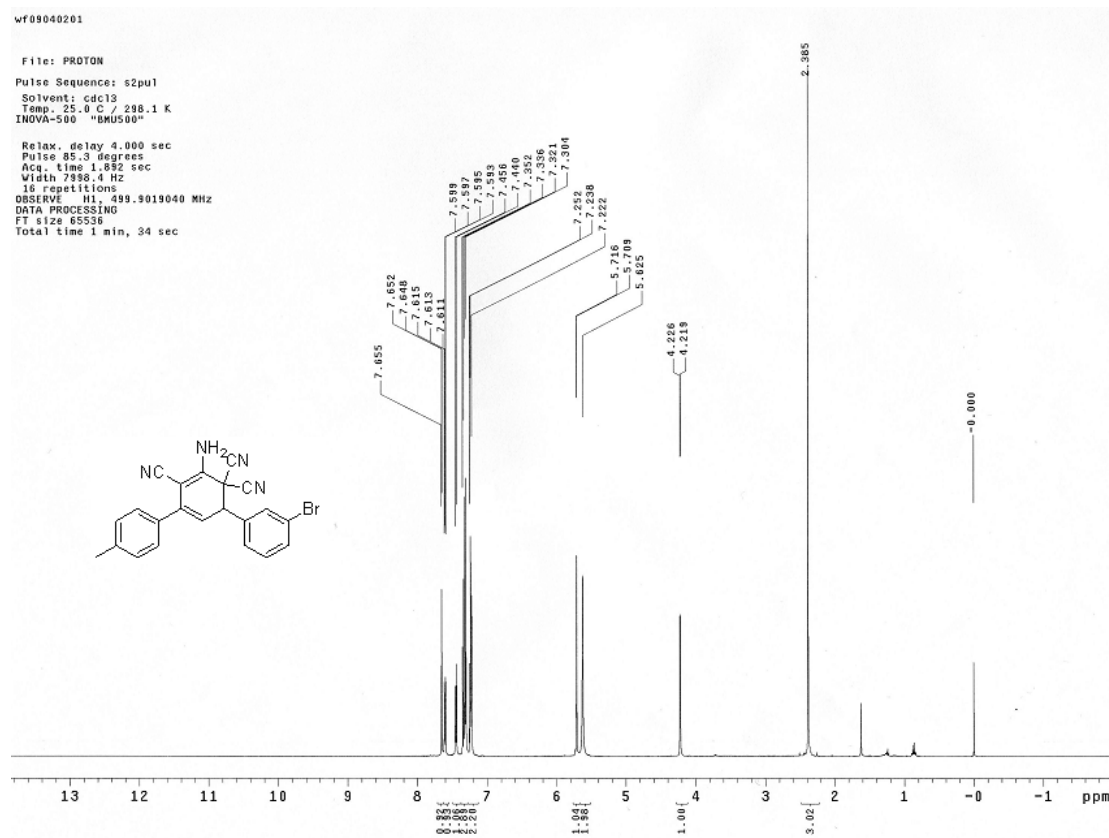

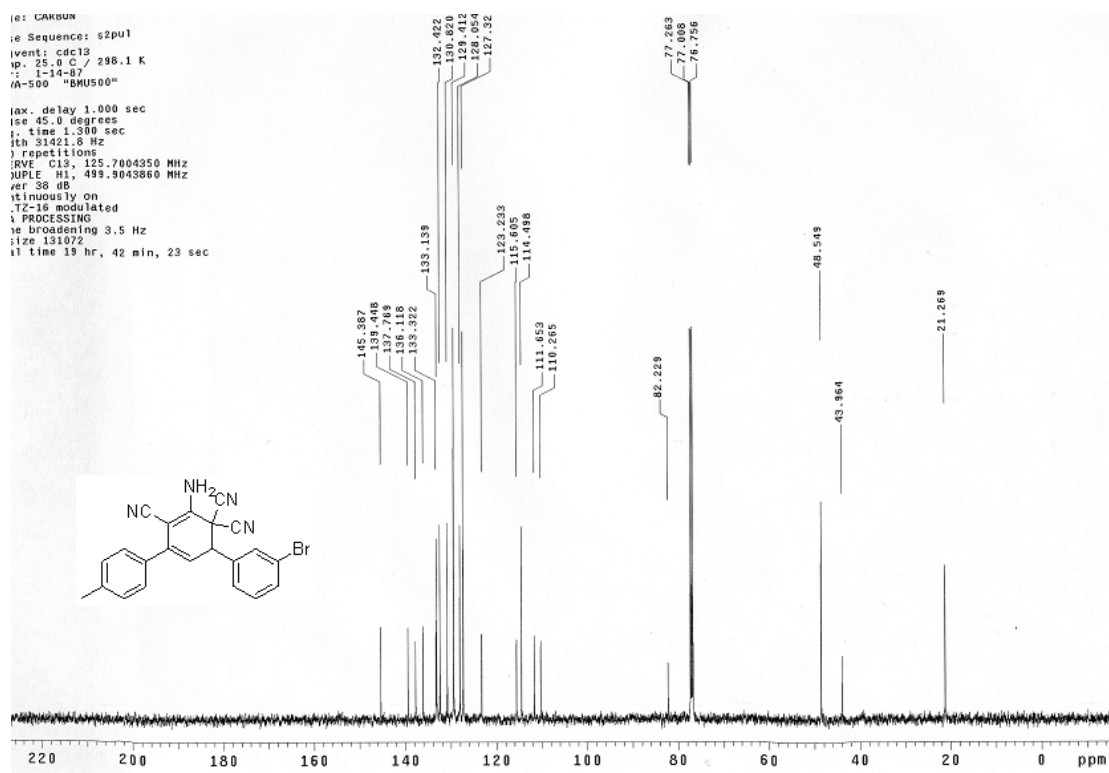

3j

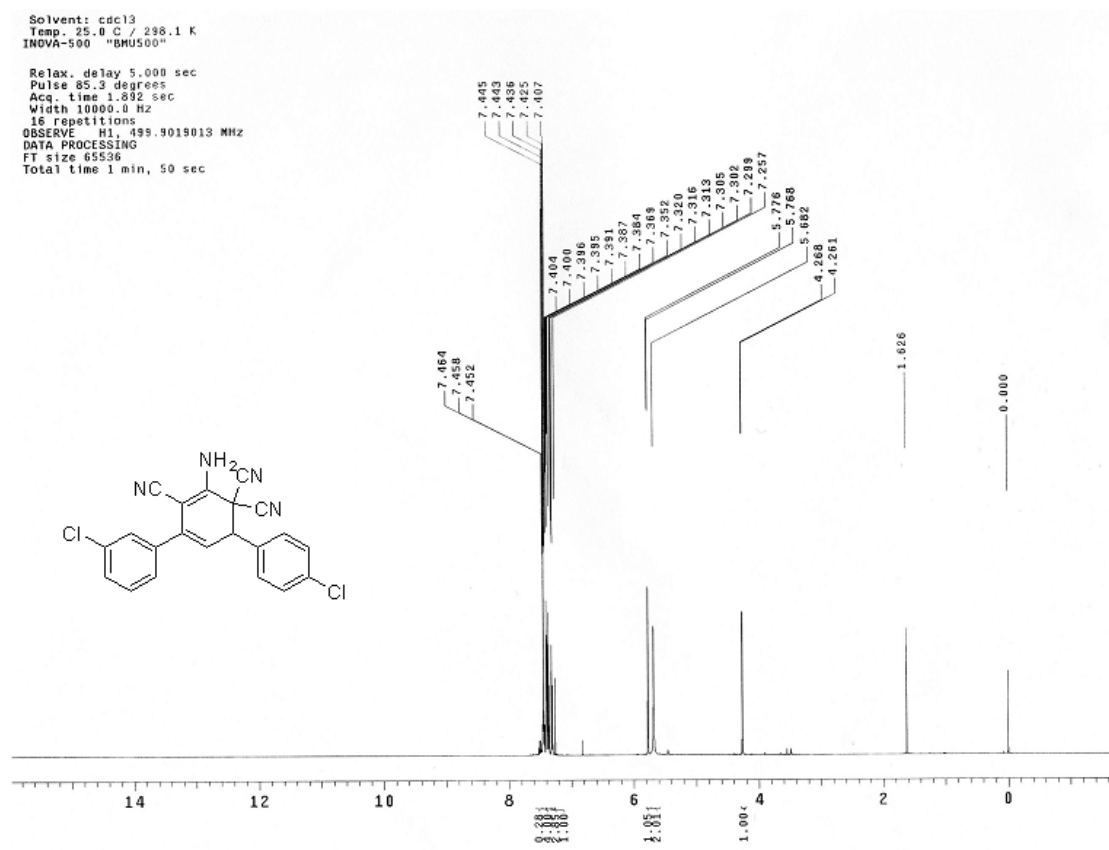

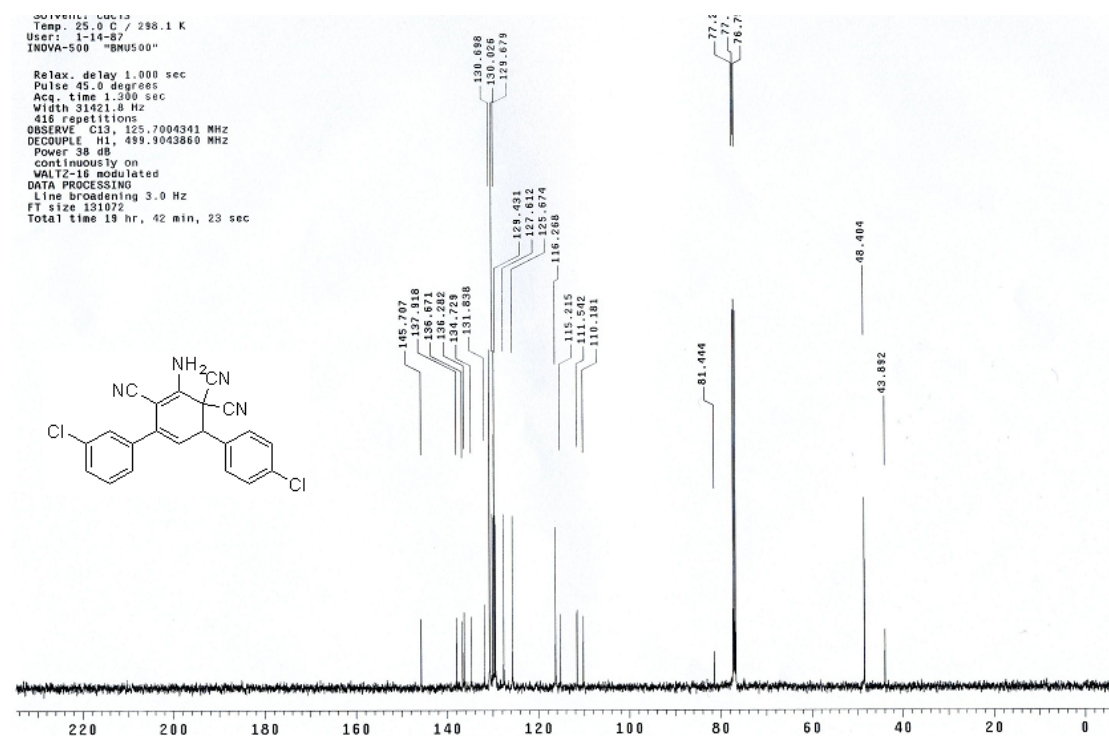

### 3k

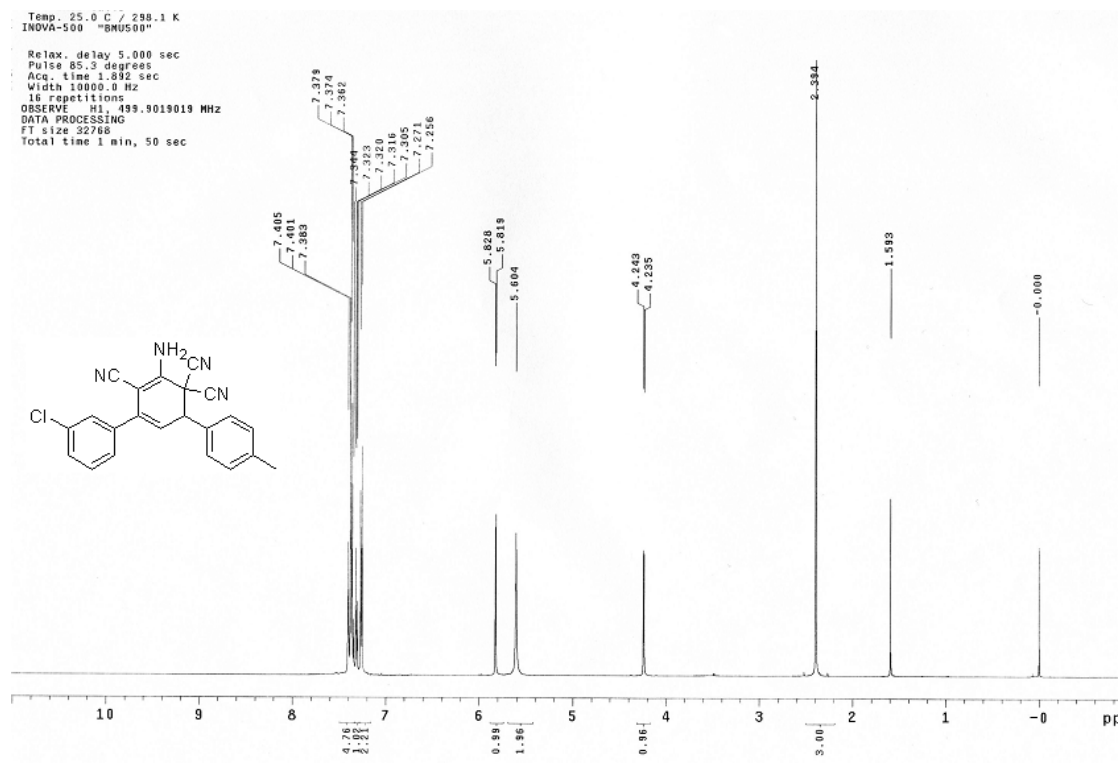

Supplementary Material (ESI) for Organic & Biomolecular Chemistry  
 This journal is (c) The Royal Society of Chemistry 2010

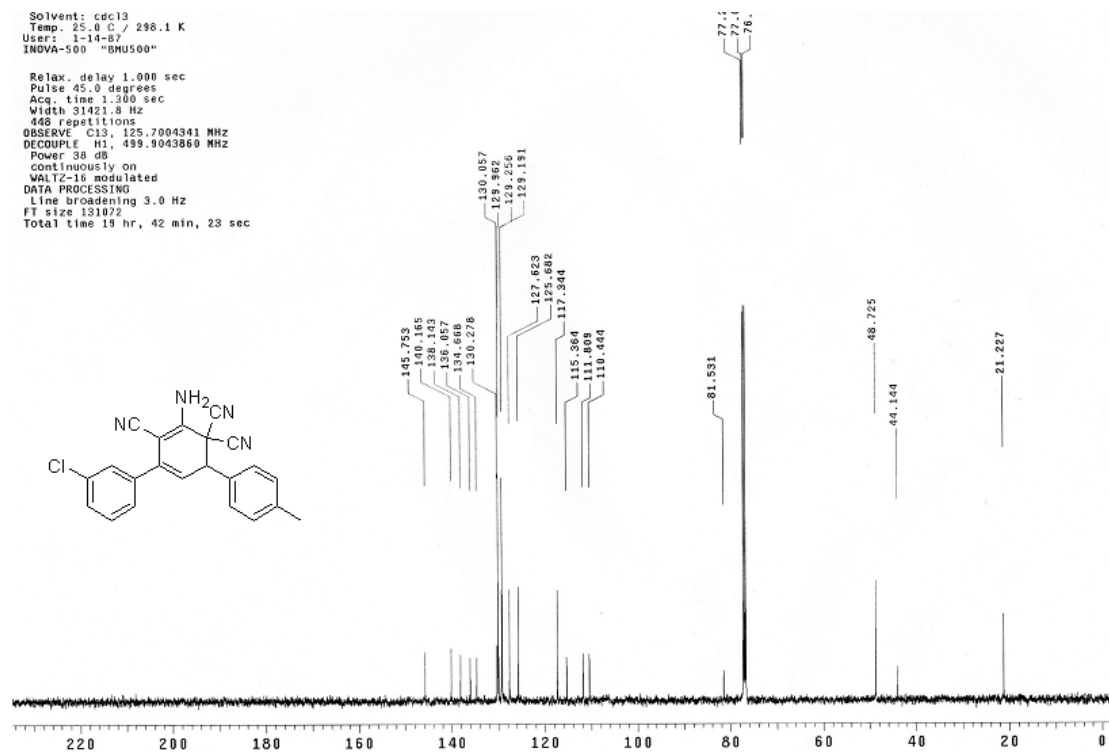

**31**

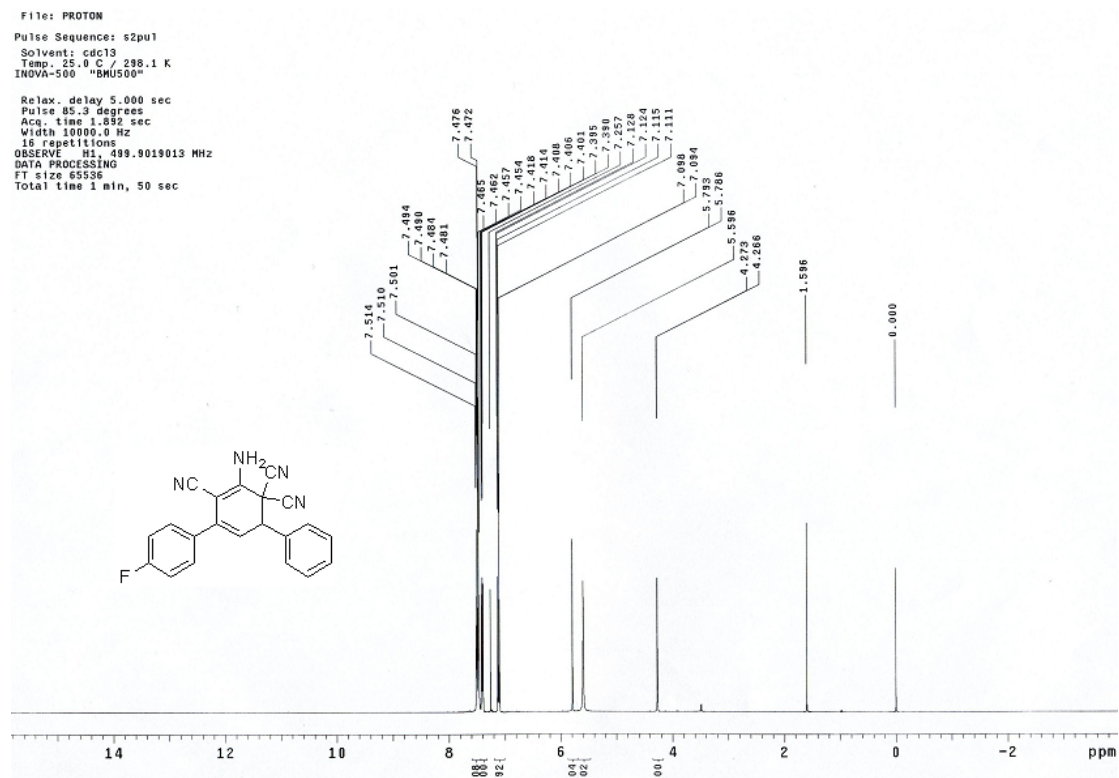

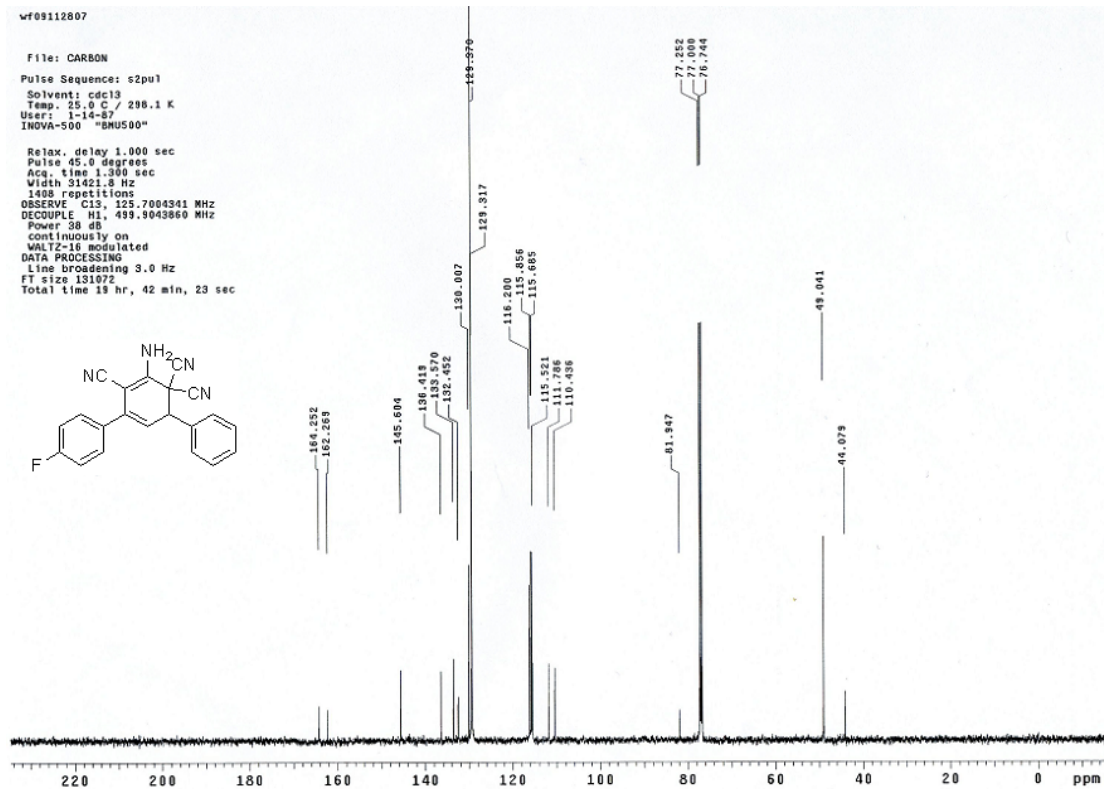

### 3m

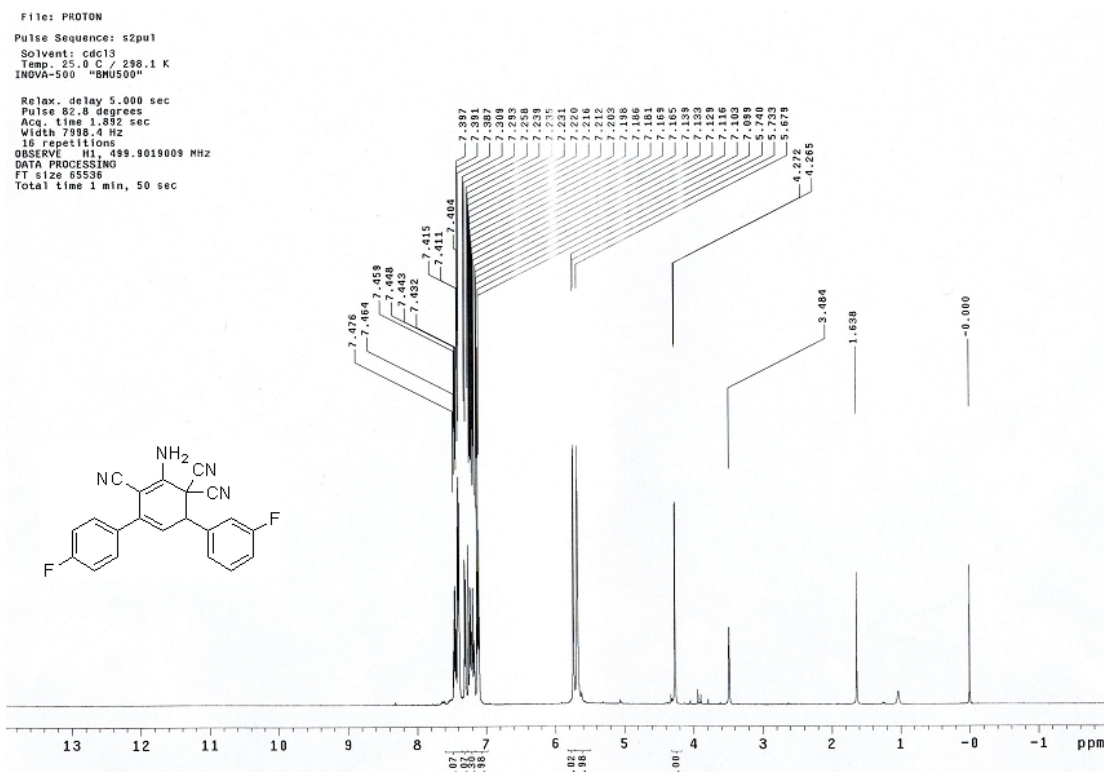

Supplementary Material (ESI) for Organic & Biomolecular Chemistry  
 This journal is (c) The Royal Society of Chemistry 2010

wf09121401

File: CARBON  
 Pulse Sequence: s2pu1  
 Solvent: CDCl3  
 Temp: 25.0 C / 298.1 K  
 User: 1-14-07  
 INOVA-500 "8MUS00"  
 Relax. delay 1.000 sec  
 Pulse 45.0 degrees  
 Acq. time 0.700 sec  
 Width 31421.8 Hz  
 3456 repetitions  
 OBSERVE C13, 125.7004355 MHz  
 DECOUPLE H1, 499.9043869 MHz  
 Power 32 dB  
 continuously on  
 WALTZ-16 modulated  
 DATA PROCESSING  
 Line broadening 3.0 Hz  
 FT size 65536  
 Total time 4 hr, 51 min, 39 sec

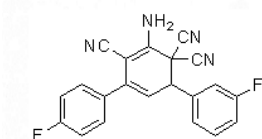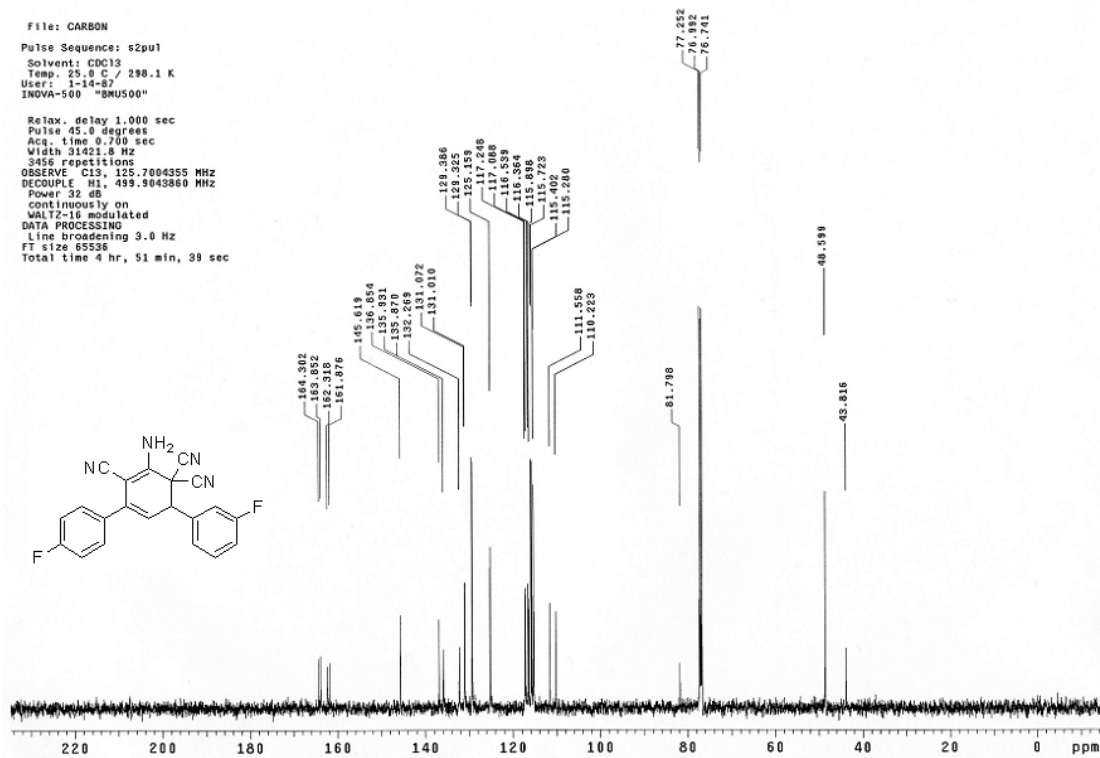

**3n**

Temp: 25.0 C / 298.1 K  
 INOVA-500 "8MUS00"  
 Relax. delay 4.000 sec  
 Pulse 85.0 degrees  
 Acq. time 1.892 sec  
 Width 8368.2 Hz  
 16 repetitions  
 OBSERVE H1, 499.9019009 MHz  
 DATA PROCESSING  
 FT size 65536  
 Total time 1 min, 34 sec

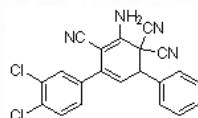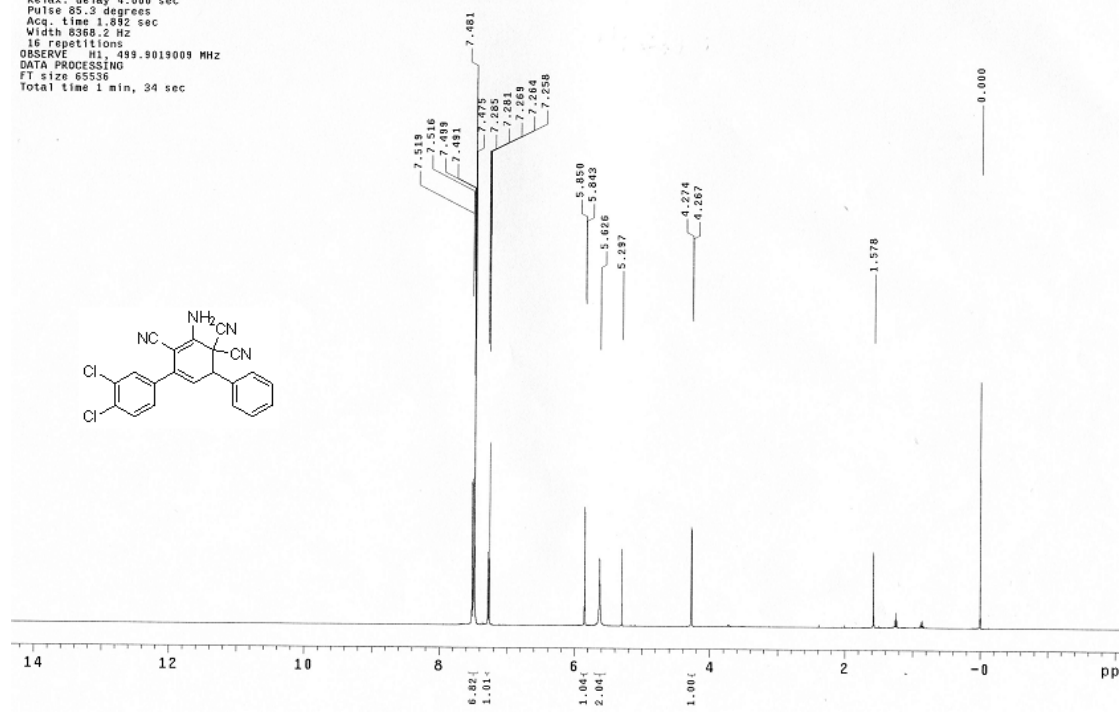

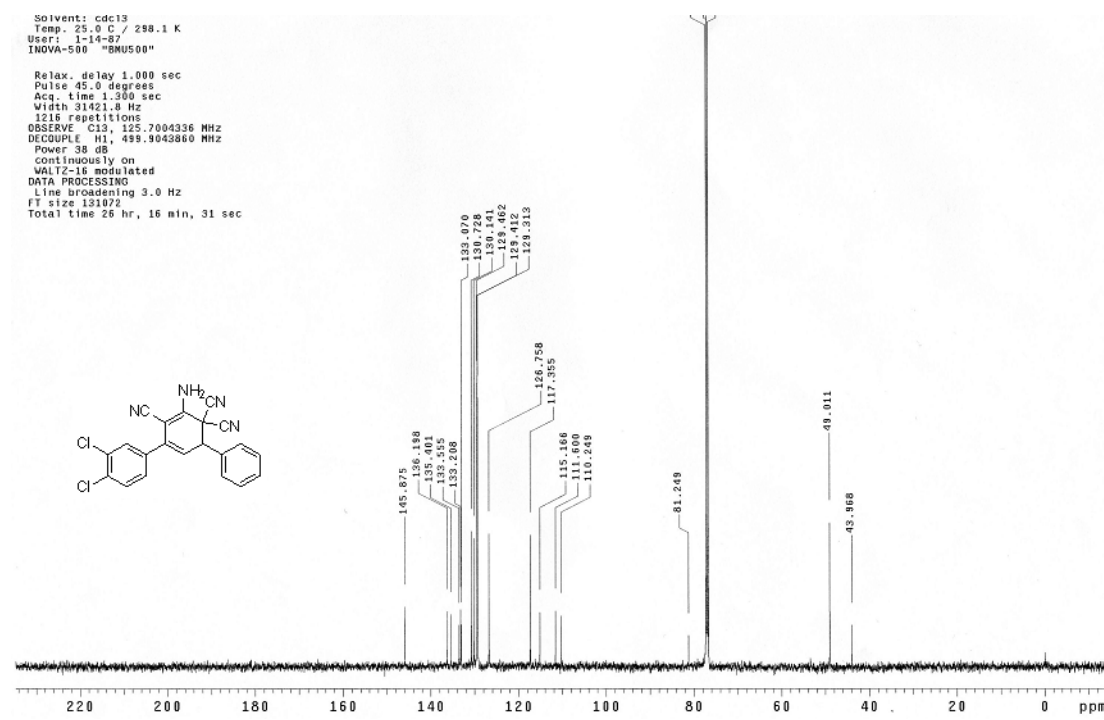

### 3o

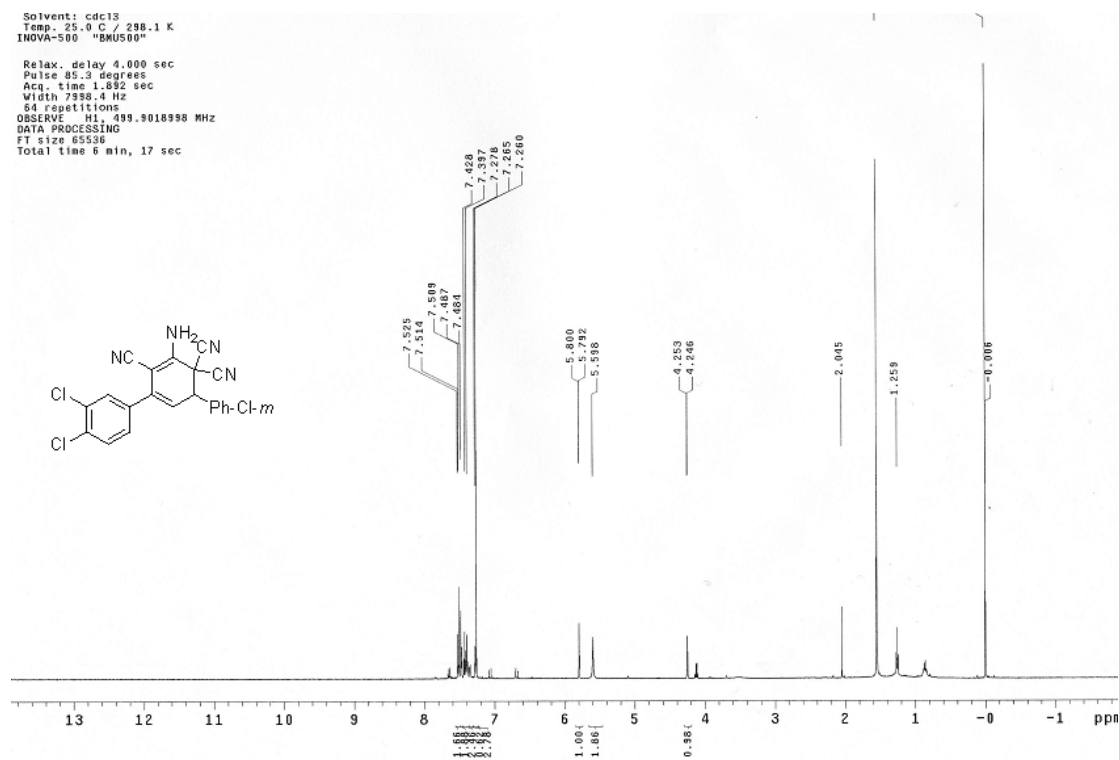

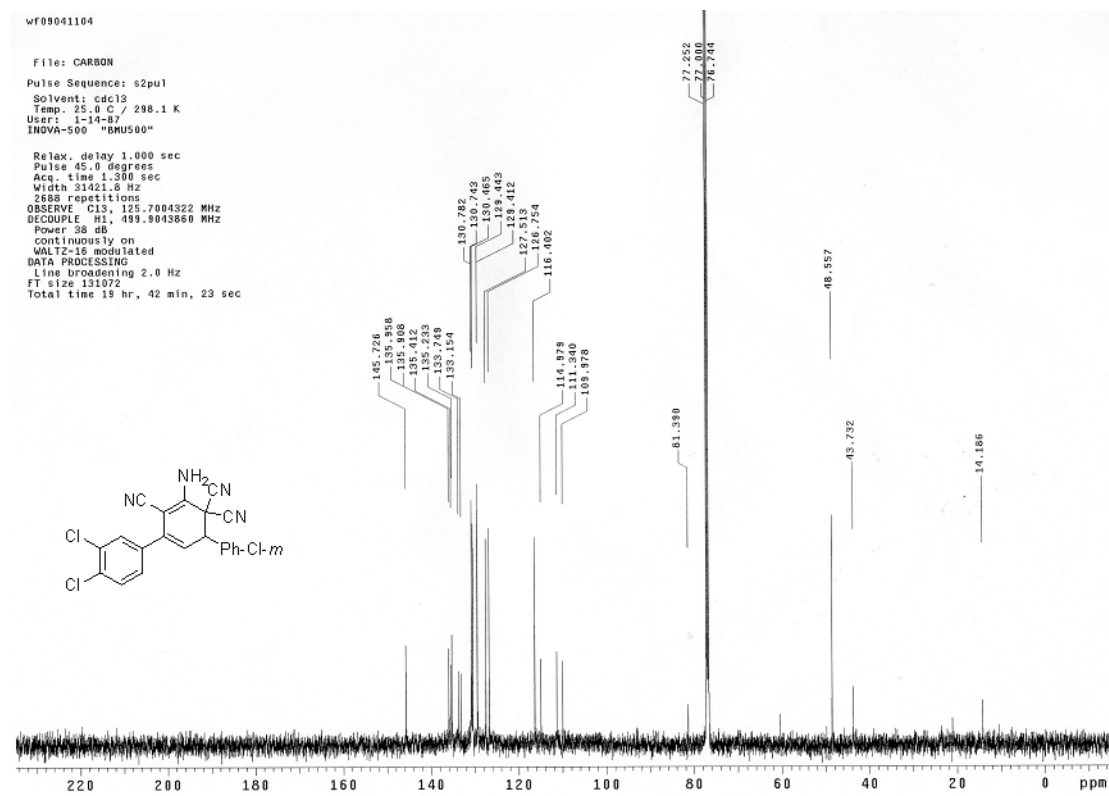

3p

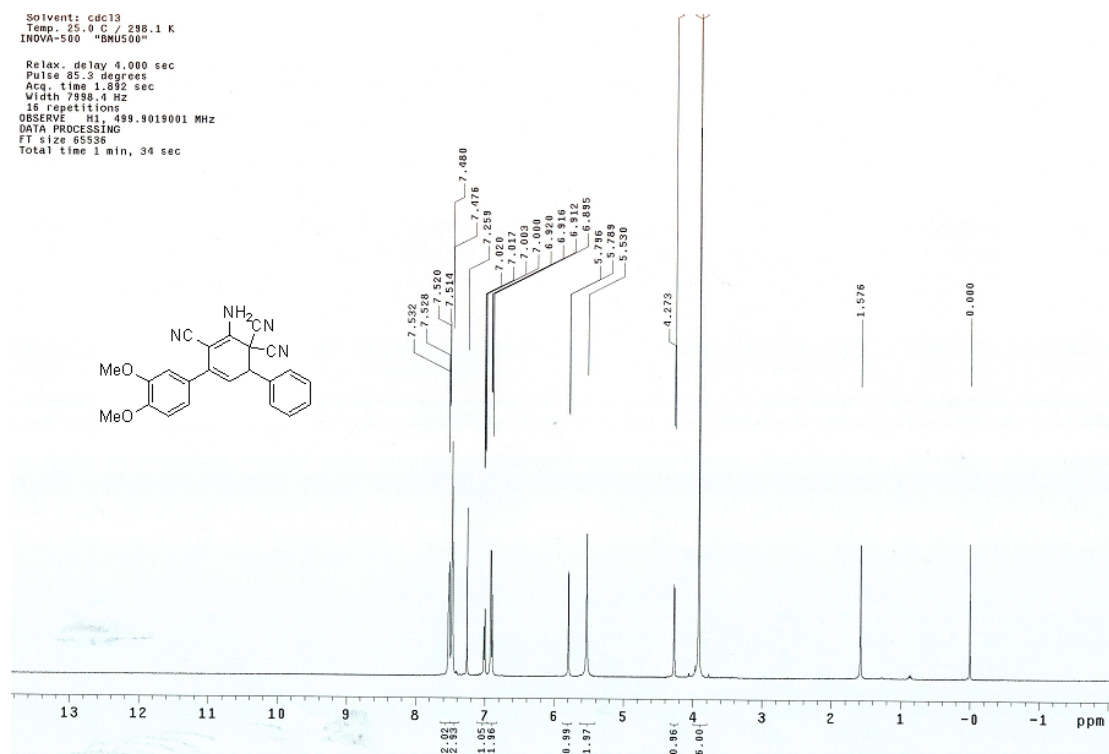



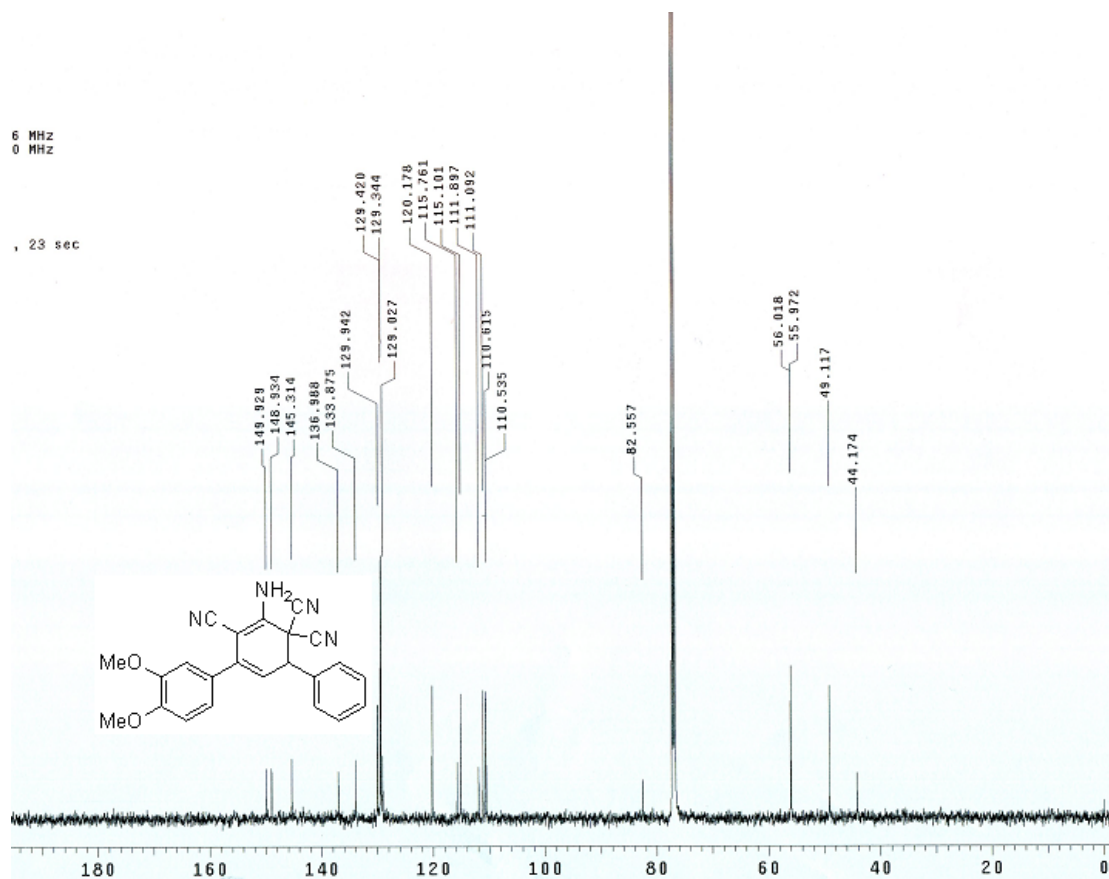

**7a**

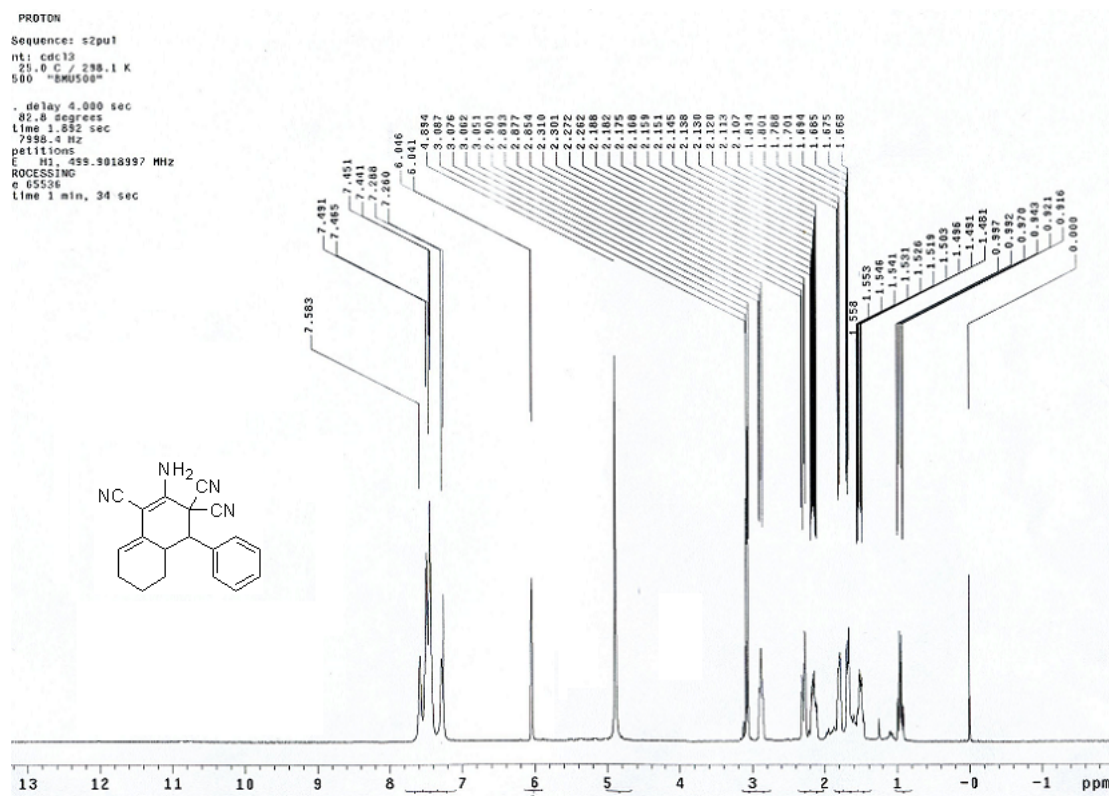

Supplementary Material (ESI) for Organic & Biomolecular Chemistry  
This journal is (c) The Royal Society of Chemistry 2010

wf09121309

File: CARBON  
Pulse Sequence: s2pu1  
Solvent: CDCl3  
Temp: 25.0 C / 298.1 K  
User: 1-14-87  
INOVA-500 "BMUS00"

Relax. delay 1.000 sec  
Pulse: 45.0 degrees  
Acq. time 0.700 sec  
Width 31421.6 Hz  
2888 repetitions  
OBSERVE C13, 125.7004336 MHz  
DECOUPLE H1, 499.9043860 MHz  
Power 32 dB  
continuously on  
WALTZ-16 modulated  
DATA PROCESSING  
Line broadening 3.0 Hz  
FT size 65536  
Total time 4 hr, 51 min, 39 sec

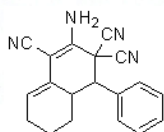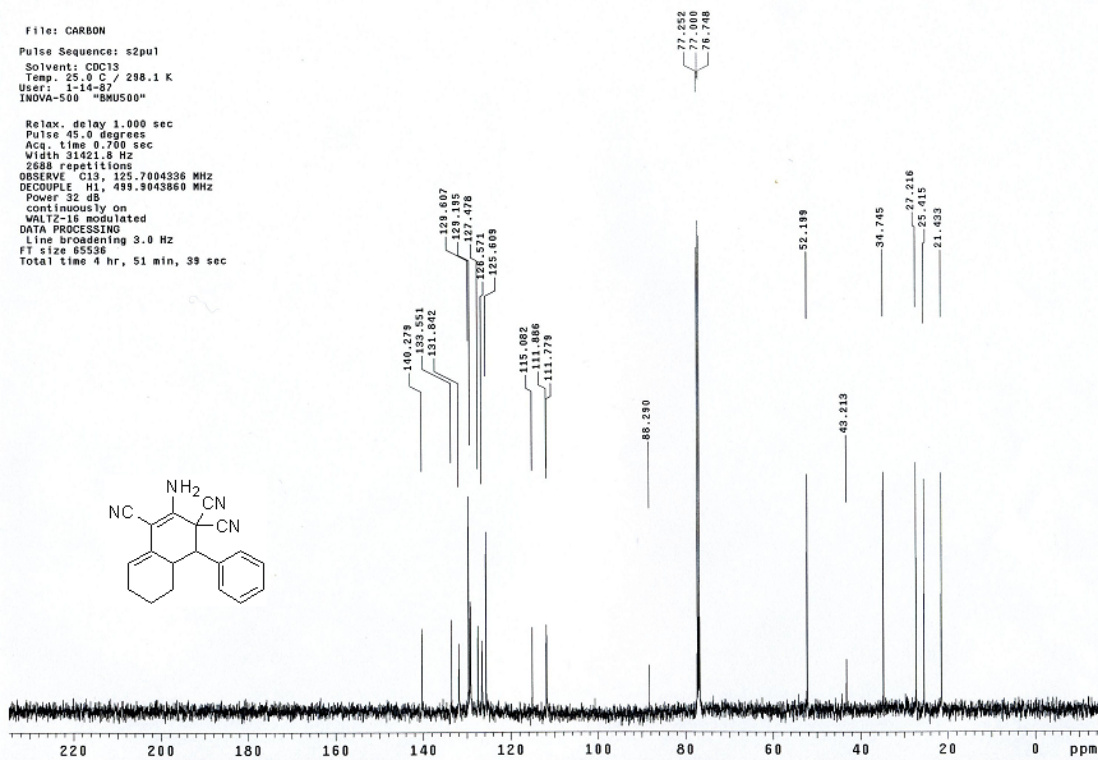

Supplement: c0ob00089b.pdf [file c0ob00089b.pdf]
